1

2 **Title:** “A distinct neutrophil population invades the central nervous system during  
3 pancreatic cancer”

4

5

6 Kevin G. Burfeind<sup>1,2</sup>, Xinxia Zhu<sup>1</sup>, Mason A. Norgard<sup>1</sup>, Peter R. Levasseur<sup>1</sup>,  
7 Brennan Olson<sup>1,2</sup>, Katherine A. Michaelis<sup>1,2</sup>, Eileen Ruth S. Torres<sup>3</sup>, Esha M.  
8 Patel<sup>3</sup>, Sophia Jeng<sup>5,6</sup>, Shannon McWeeney<sup>4-6</sup>, Jacob Raber<sup>3,7</sup>, Daniel L.  
9 Marks<sup>1,6,8\*</sup>.

10

11

12 <sup>1</sup> Papé Family Pediatric Research Institute, Oregon Health & Science University,  
13 Portland, OR USA

14 <sup>2</sup> Medical Scientist Training Program, Oregon Health & Science University,  
15 Portland, OR USA

16 <sup>3</sup> Department of Behavioral Neuroscience, Oregon Health & Science University,  
17 Portland, OR USA

18 <sup>4</sup> Division of Bioinformatics and Computational Biology, Department of Medical  
19 Informatics and Clinical Epidemiology, Oregon Health & Science University,  
20 Portland, OR USA

21 <sup>5</sup> Oregon Clinical and Translational Research Institute, Oregon Health & Science  
22 University, Portland, OR USA

23 <sup>6</sup> Knight Cancer Institute, Oregon Health & Science University, Portland, OR USA

24 <sup>7</sup> Departments of Neurology and Radiation Medicine, Division of Neuroscience

25 ONPRC, Oregon Health and & Science University, Portland, OR USA

26 <sup>8</sup> Brenden-Colson Center for Pancreatic Care, Oregon Health and & Science

27 University Portland, OR USA

28

29 *\*Corresponding Author Information*

30 Daniel L. Marks

31 3181 SW Sam Jackson Park Road

32 L 481

33 Portland, OR 97239

34 Email: [marksd@ohsu.edu](mailto:marksd@ohsu.edu)

35

36

37

38

39

40

41

42

43

44

45

46

47

48

49

50

51 **Abstract**

52 Weight loss, fatigue, and cognitive dysfunction are common symptoms in cancer  
53 patients that occur prior to initiation of cancer therapy. Inflammation in the brain  
54 is a driver of these symptoms, yet cellular sources of neuroinflammation during  
55 malignancy are unknown. In a mouse model of pancreatic ductal  
56 adenocarcinoma (PDAC), we observed early and robust myeloid cell infiltration  
57 into the brain. Infiltrating immune cells were predominately neutrophils, which  
58 accumulated at a unique central nervous system entry portal called the velum  
59 interpositum, where they expressed CCR2. CCR2 knockout mice had  
60 significantly decreased brain-infiltrating neutrophils as well as attenuated  
61 anorexia and muscle catabolism during PDAC, without any changes in  
62 neutrophils in other organs. Lastly, intracerebroventricular blockade of the  
63 purinergic receptor P2RX7 during PDAC abolished neutrophil recruitment to the  
64 brain and attenuated anorexia. Our data demonstrate a novel function for the  
65 CCR2/CCL2 axis in recruiting neutrophils to the brain, which drives anorexia and  
66 muscle catabolism.

67

68 **Keywords:** Neuroinflammation, Neuroimmunology, Neutrophils, Cancer  
69 Cachexia, Brain, Myeloid Cells,

70

71

72

73

## 74 **Introduction**

75           Cancer patients commonly present with symptoms driven by disruption of  
76 normal CNS function. Weight loss, weakness, fatigue, and cognitive decline often  
77 occur in malignancies outside the CNS, and develop prior to initiation of cancer  
78 therapy (Meyers, 2000; Miller, Ancoli-Israel, Bower, Capuron, & Irwin, 2008).  
79 Many of these symptoms are part of a syndrome called cachexia, a devastating  
80 state of malnutrition characterized by decreased appetite, fatigue, adipose tissue  
81 loss, and muscle catabolism (Fearon et al., 2011). There are currently no  
82 effective treatments for cachexia or other CNS-mediated cancer symptoms.  
83 While mechanisms of CNS dysfunction during malignancy are still not well  
84 understood, inflammation in the brain is proposed as a key driver (Burfeind,  
85 Michaelis, & Marks, 2016). Inflammatory molecules (e.g., lipopolysaccharide,  
86 cytokines) can cause dysfunction of the appetite-, cognition- weight-, and activity-  
87 regulating regions in the CNS, resulting in signs and symptoms nearly identical to  
88 those observed during cancer (T. P. Braun et al., 2011; Burfeind et al., 2016;  
89 Grossberg et al., 2011). Moreover, cytokines and chemokines are produced in  
90 these same regions during multiple types of cancer (Michaelis et al., 2017). Our  
91 lab and others previously showed that disrupting inflammatory signaling by  
92 deleting either MyD88 or TRIF attenuates anorexia, muscle catabolism, fatigue,  
93 and neuroinflammation during malignancy (Burfeind et al., 2018; Ruud et al.,  
94 2013).

95           The mechanisms by which inflammation generated in the periphery (e.g.,  
96 at the site of a malignancy) is translated into inflammation in the brain, and how

97 this is subsequently translated CNS dysfunction, are still not known. Circulating  
98 immune cells present an intriguing cellular candidate, as they are thought to  
99 infiltrate and interact with the brain during various states of inflammation (Prinz &  
100 Priller, 2017), yet have not been investigated as potential mediators of brain  
101 dysfunction during cancer. Therefore, we characterized the identity, properties,  
102 and function of infiltrating immune cells in the brain using a syngeneic,  
103 immunocompetent, mouse model of pancreatic ductal adenocarcinoma (PDAC),  
104 a deadly malignancy associated with profound anorexia, fatigue, weakness, and  
105 cognitive dysfunction (Baekelandt et al., 2016; Michaelis et al., 2017). We  
106 observed that circulating myeloid cells, primarily neutrophils, were recruited to  
107 the CNS early in PDAC, infiltrating throughout the brain parenchyma and  
108 accumulating in the meninges near regions important for appetite, behavior, and  
109 body composition regulation. We then demonstrated a novel role for the CCR2-  
110 CCL2 axis (typically considered a monocyte chemotaxis pathway) in recruiting  
111 neutrophils specifically to the brain, rather than the liver or tumor. We also  
112 demonstrated that this axis is important for the development of anorexia and  
113 muscle catabolism during PDAC. Next, we blocked purinergic receptor P2RX7  
114 signaling specifically on brain macrophages during PDAC via  
115 intracerebroventricular (ICV) injection of oxidized ATP (oATP), which prevented  
116 circulating myeloid cell recruitment to the brain and attenuated anorexia. Lastly,  
117 we showed that during PDAC, brain-infiltrating neutrophils have a transcriptional  
118 profile that is distinct from that of circulating, liver-infiltrating, and tumor-infiltrating  
119 neutrophils. Taken together, these results reveal a novel mechanism for

120 neutrophil recruitment to the brain, in which a transcriptionally distinct population  
121 is recruited via an atypical neutrophil chemotactic factor, in a manner distinct  
122 from that in the periphery.

123

124

## 125 **Results**

### 126 **Circulating myeloid cells infiltrate the brain early in PDAC**

127 We first investigated whether circulating immune cells infiltrate the brain  
128 throughout the course of PDAC. We utilized a mouse model of PDAC, generated  
129 through a single intraperitoneal (IP) injection of C57BL/6  
130  $KRAS^{G12D} P53^{R172H} Pdx-Cre^{+/+}$  (KPC) cells. This well-characterized model  
131 recapitulates several key signs and symptoms of CNS dysfunction observed in  
132 humans, including anorexia, muscle catabolism, and fatigue (Michaelis et al.,  
133 2017). Using 10-color flow cytometry of whole brain homogenate (Fig. 1A), we  
134 characterized brain immune cells at three time points: 5 days post-inoculation  
135 (d.p.i) (before anorexia, fatigue, and muscle mass loss onset), 7 d.p.i. (initiation  
136 of wasting and anorexia), and 10 d.p.i. (robust wasting and anorexia, but 2-3  
137 days before death) (see either ref 6 or Fig. 5F for typical disease progression in  
138 our KPC model). Compared to sham-injected animals, we observed a significant  
139 increase in  $CD45^{high}CD11b^{+}$  myeloid cells in the brains of animals with PDAC  
140 (Fig. 1B), with an increase as a percentage of total  $CD45^{+}$  (all immune cells) and  
141  $CD45^{high}$  (non-microglia leukocytes) cells occurring at 5 d.p.i. (Fig. 1D and Figure  
142 1 – figure supplement 1D).

143 Both absolute and relative number of lymphocytes (CD45<sup>high</sup>CD11b-) were  
144 decreased in the brains of tumor animals compared to sham animals starting at 5  
145 d.p.i., which was driven by a decrease in B-cells and CD4+ T-cells (Fig. 1C and  
146 Figure 1 – figure supplement 1B-D). There was no change in number of microglia  
147 (defined as CD45<sup>mid</sup>CD11b+) throughout the disease course (Fig. 1C). Further  
148 phenotypic analysis of infiltrating myeloid cells revealed that by 7 d.p.i., there was  
149 an increase in relative number (as a percentage of total CD45+ and CD45<sup>high</sup>) of  
150 Ly6C<sup>mid</sup>Ly6G<sup>high</sup> neutrophils, Ly6C<sup>low</sup> myeloid cells, and Ly6C<sup>high</sup> monocytes (Fig.  
151 1D, E and Figure 1 – figure supplement 1D). We observed an increase in  
152 absolute number of neutrophils, Ly6C<sup>high</sup> monocytes, and Ly6C<sup>low</sup> myeloid cells  
153 starting at 7 d.p.i., which became significant at either 7 (Ly6C<sup>high</sup> monocytes) or  
154 10 d.p.i. (neutrophils and Ly6C<sup>low</sup> myeloid cells) (Fig. 1D and E). Neutrophils  
155 were by far the most numerous invading myeloid cell type, constituting 34%  
156 percent of CD45<sup>high</sup>CD11b+ cells in sham animals, and increasing to nearly 54%  
157 by 10.d.p.i. in tumor animals (Fig. 1F).

158 Since the CD45<sup>high</sup>CD11b+ population we defined as invading circulating  
159 myeloid cells could also contain activated microglia, we generated GFP+ bone  
160 marrow chimera to determine if the majority of these cells were of peripheral  
161 origin. Furthermore, the population of CD45<sup>high</sup>CD11b+Ly6C<sup>low</sup> myeloid cells  
162 could also be activated microglia. We generated GFP+ bone marrow chimera  
163 mice through conditioning WT mice with treosulfan to ablate marrow, then  
164 transplanting marrow from pan-GFP mice (Ly5.1<sup>GFP</sup>) (Figure 1 – figure  
165 supplement 2A). This system is advantageous because, unlike other alkylating

166 agents, treosulfan does not cross or disrupt the blood brain barrier (Capotondo et  
167 al., 2012). On average, mice that underwent bone marrow transplant (GFP BMT  
168 mice) exhibited 75% chimerism (Figure 1 – figure supplement 2C). In agreement  
169 with results from WT marrow animals, we observed that at 10 d.p.i., thousands of  
170 GFP+ myeloid cells infiltrated the brain in tumor animals (Figure 1 – figure  
171 supplement 2B). The majority of these cells were neutrophils, with a concurrent  
172 increase in Ly6C<sup>high</sup> monocytes (Figure 1 – figure supplement 2C-F). As we  
173 observed previously, this coincided with a decrease in brain lymphocytes  
174 (CD45+GFP+CD11b-) in tumor animals (Figure 1 – figure supplement 2D). We  
175 did not observe an increase in GFP+ Ly6C<sup>low</sup> myeloid cells (Figure 1 – figure  
176 supplement 2F), suggesting that the increase in CD45<sup>high</sup>CD11b+Ly6C<sup>low</sup> cells in  
177 our WT marrow PDAC mice was a result of microglia activation, rather than  
178 infiltrating monocytes.

179 Taken together, these data show that myeloid cells infiltrate the brain  
180 during PDAC, which correlates with symptom onset, and that there is a selective  
181 neutrophil recruitment. Since the purpose of this study was to investigate  
182 infiltrating cells, we chose to focus our subsequent analysis on myeloid cells, with  
183 an emphasis on neutrophils.



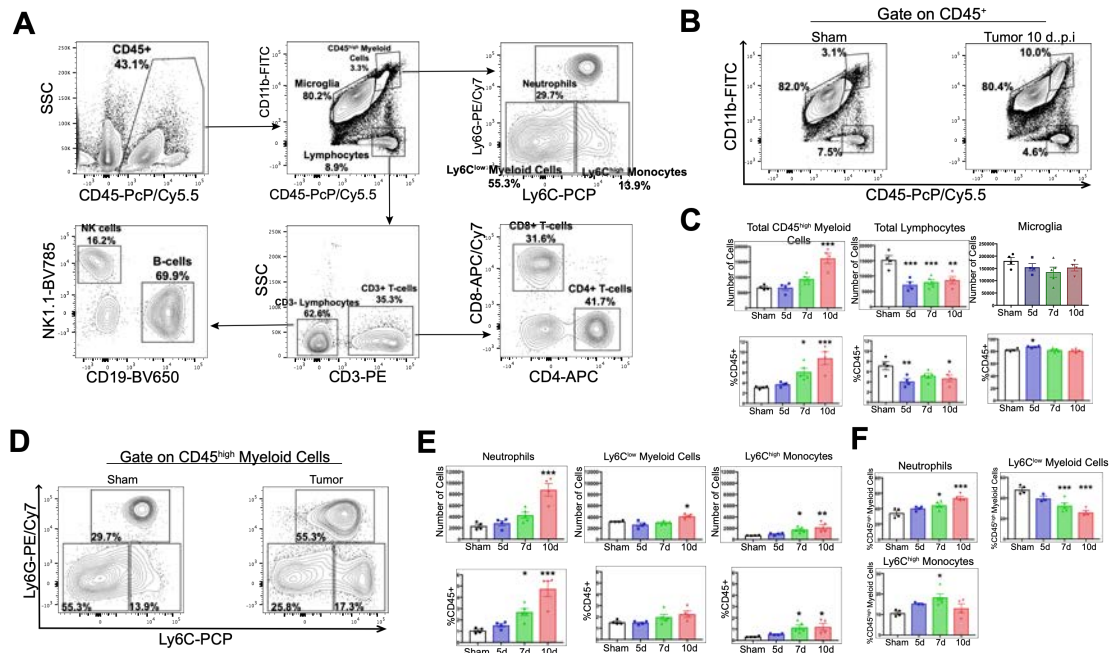

184

185 **Figure 1. Myeloid cells infiltrate the brain during PDAC.** A) Flow cytometry  
 186 plots of immune cells isolated from whole brain homogenate, showing gating  
 187 strategy to identify different immune cell populations. B) Representative flow  
 188 cytometry plots displaying CD45 and CD11b fluorescent intensities of immune  
 189 cells isolated from brains of tumor and sham animals, gated on live, singlet,  
 190 CD45+ cells. C) Quantification of different immune cell populations in the brain at  
 191 different time points throughout PDAC course. d = days post inoculation.  
 192 Populations were identified as shown in Fig. 1a. D) Representative flow  
 193 cytometry plots displaying Ly6C and Ly6G fluorescent intensities of immune cells  
 194 isolated from brains of tumor and sham animals, gated on CD45<sup>high</sup>CD11b<sup>high</sup>  
 195 cells. E) Quantification of different CD45<sup>high</sup> myeloid cell populations in the brain  
 196 at different time points during PDAC progression. F) Relative amounts of different  
 197 CD45<sup>high</sup> myeloid cell populations as a percentage of total CD45<sup>high</sup> myeloid cells,  
 198 throughout the course of PDAC. Populations identified as described for Fig. 1e. *n*

199 = 4-5/group, \* $P < 0.05$ , \*\* $P < 0.01$ , \*\*\* $P < 0.001$  compared to sham group in one-  
 200 way ANOVA Bonferroni *post hoc* analysis, and results are representative of three  
 201 independent experiments. For all figures, data are presented as mean  $\pm$  s.e.m.

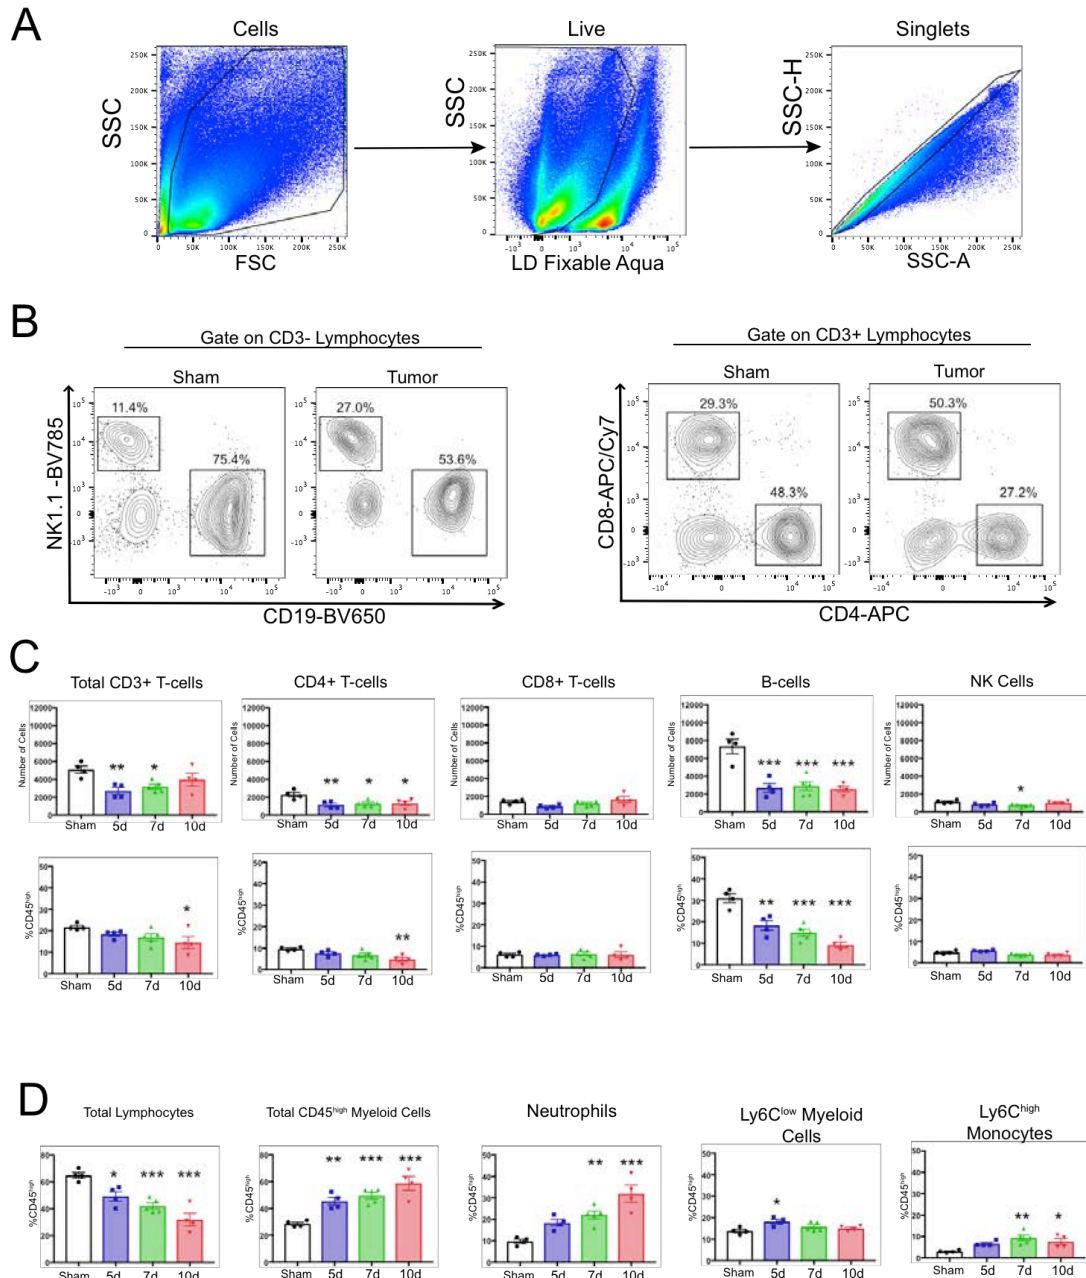

202

203 **Figure 1 – Figure Supplement 1. Decreased lymphocytes in the brain during**

204 **PDAC cachexia. A) Gating strategy to identify live single cells from whole brain**

205 homogenate. B) Representative plots of different lymphocyte populations from  
 206 brain homogenate from sham and tumor (10 d.p.i.) animals. For CD3<sup>-</sup> cells, NK  
 207 cells = NK1.1+CD19<sup>-</sup>, B-cells = CD19+NK1.1<sup>-</sup>. For CD3<sup>+</sup> cells, CD4<sup>+</sup> and CD8<sup>+</sup>  
 208 T-cells were identified. C) Quantification of different lymphocyte populations  
 209 throughout the course of cachexia. \**P* < 0.05, \*\**P* < 0.01, \*\*\**P* < 0.001 compared  
 210 to sham one-way ANOVA Bonferroni *post hoc* analysis. D) Quantification of  
 211 different immune cell populations in the brain throughout the course of cachexia,  
 212 as a percentage of CD45<sup>high</sup> cells. \**P* < 0.05, \*\**P* < 0.01, \*\*\**P* < 0.001 compared  
 213 to sham. *n* = 4-5/group. Results are representative of three independent  
 214 experiments.  
 215

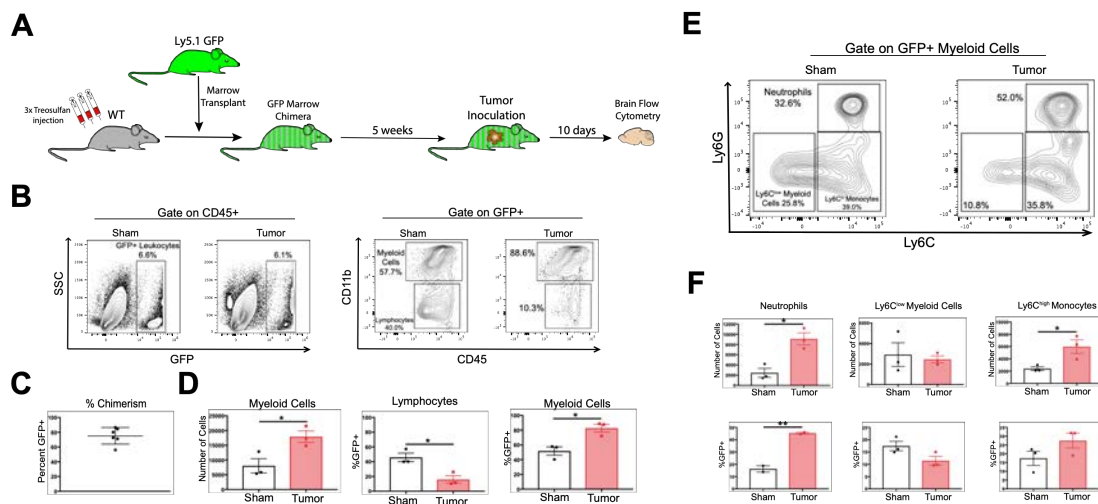

216

217 **Figure 1 – Figure Supplement 2. GFP BMT confirms peripheral origin of**  
 218 **infiltrating myeloid cells in the CNS during PDAC.** A) Diagram of bone  
 219 marrow transplant protocol to generate GFP<sup>+</sup> bone marrow chimeras. B) Gating  
 220 strategy for CD45<sup>+</sup>GFP<sup>+</sup> cells isolated from brains of tumor and sham GFP  
 221 chimera animals. C) Percent chimerism, identified as percentage of CD45<sup>+</sup> cells

222 in the blood that were GFP+. D) Quantification of GFP+ myeloid cells and  
223 lymphocytes in the brains of tumor and sham mice, 10 d.p.i. E) Representative  
224 flow cytometry plot of different GFP+ myeloid cell populations in the brains of  
225 tumor and sham GFP bone marrow chimera animals, 10 d.p.i. F) Quantification  
226 of different GFP+ myeloid cell populations in the brains of tumor and sham GFP  
227 bone marrow chimera animals, 10 d.p.i., as identified in Fig. 1k.  $n = 3/\text{group}$ ,  $*P <$   
228  $0.05$ ,  $**P < 0.01$  in student's t-test.

229

### 230 **Invading myeloid cells accumulate at CNS interfaces during PDAC**

231 Prior studies demonstrated regional vulnerability in the CNS to immune  
232 cell invasion during systemic inflammation (D'Mello, Le, & Swain, 2009).  
233 Therefore, we investigated the anatomic distribution of infiltrating myeloid cells in  
234 the CNS. We performed immunofluorescence immunohistochemistry analysis at  
235 10 d.p.i., since all tumor-inoculated animals reliably developed anorexia, fatigue,  
236 and muscle catabolism at this time point, yet were not at terminal stage  
237 (Michaelis et al., 2017). In addition, our flow cytometry analysis demonstrated a  
238 robust immune cell infiltrate in the brain at 10 d.p.i. For initial analysis, we defined  
239 leukocytes as CD45+ globoid cells. Although we observed scattered CD45+  
240 globoid cells within the parenchyma in the cortex and thalamus in tumor mice  
241 (Figure 2 – figure supplement 1), we observed a robust increase in leukocytes in  
242 the meninges adjacent to the hippocampus and median eminence (ME) (Fig. 2B  
243 and C). We also quantified leukocytes in the area postrema, due to its  
244 importance for appetite and weight regulation (Fig. 2D). While there was an

245 increase in overall CD45 immunoreactivity, these cells appeared ramified rather  
246 than globoid (60X inset in Fig. 2D), suggesting microglia activation rather than  
247 immune cell infiltration. We did not observe any CD45+ cells in the lateral  
248 parabrachial nucleus (data not shown), which was implicated in cancer-  
249 associated anorexia (Campos et al., 2017). This was perhaps due to its lack of  
250 proximity to a circumventricular organ or meninges. Interestingly, we observed  
251 an increase in neutrophils (defined as myeloperoxidase [MPO] positive, CD45+  
252 globoid cells) only in the meninges surrounding the hippocampus (Fig. 2B). This  
253 layer of meninges, known as the velum interpositum (VI), is a double-layered  
254 invagination of the pia matter. This potential space is closed rostrally,  
255 communicates caudally with the quadrigeminal cistern, and is highly vascularized  
256 via a number of internal cerebral arterioles and veins. Recent studies  
257 demonstrate robust immune cell recruitment into the brain via this anatomical  
258 route after mild trauma, during CNS infection, and during CNS autoimmune  
259 disease (Alvarez & Teale, 2006; Schmitt, Strazielle, & Ghersi-Egea, 2012;  
260 Szmydynger-Chodobska, Shan, Thomasian, & Chodobski, 2016).

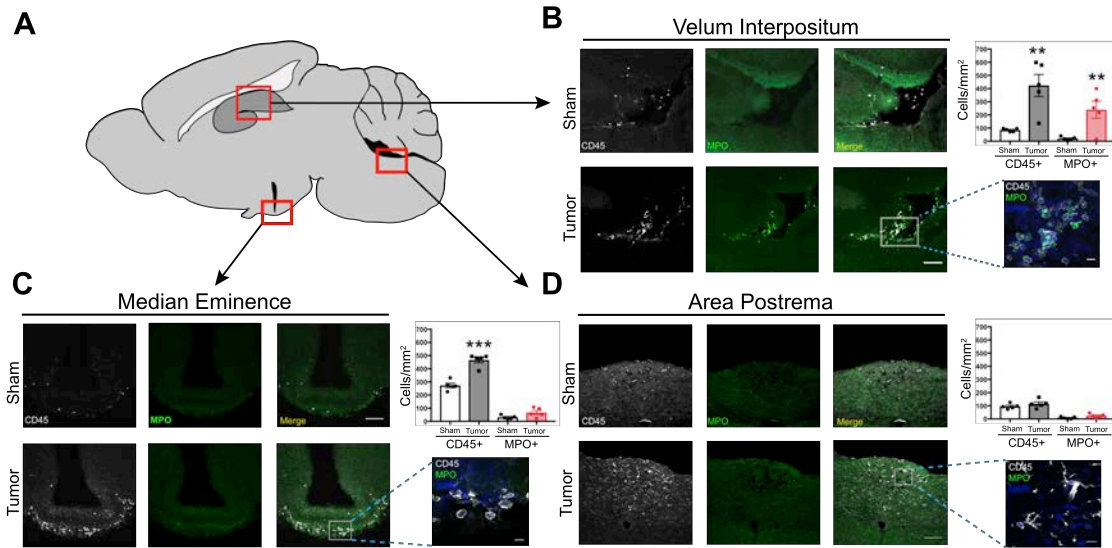

261

262 **Figure 2. Infiltrating immune cells accumulate at CNS interfaces during**

263 **PDAC cachexia.** A) Picture of sagittal mouse brain section to illustrate different

264 regions analyzed. B-) 20X images of velum interpositum (B), mediobasal

265 hypothalamus (C), and area postrema (D) of brain from sham animal and tumor

266 animal at 10 d.p.i., with 60X inset shown on the right, along with quantification of

267 MPO+ and total CD45+ cells. Scale bar for 20X images = 100 $\mu$ m. Scale bar for

268 60X insets = 10 $\mu$ m. Data are presented as mean  $\pm$  s.e.m.,  $n = 5$ /group, \* $P <$

269 0.05, \*\* $P < 0.01$  in student's t-test.



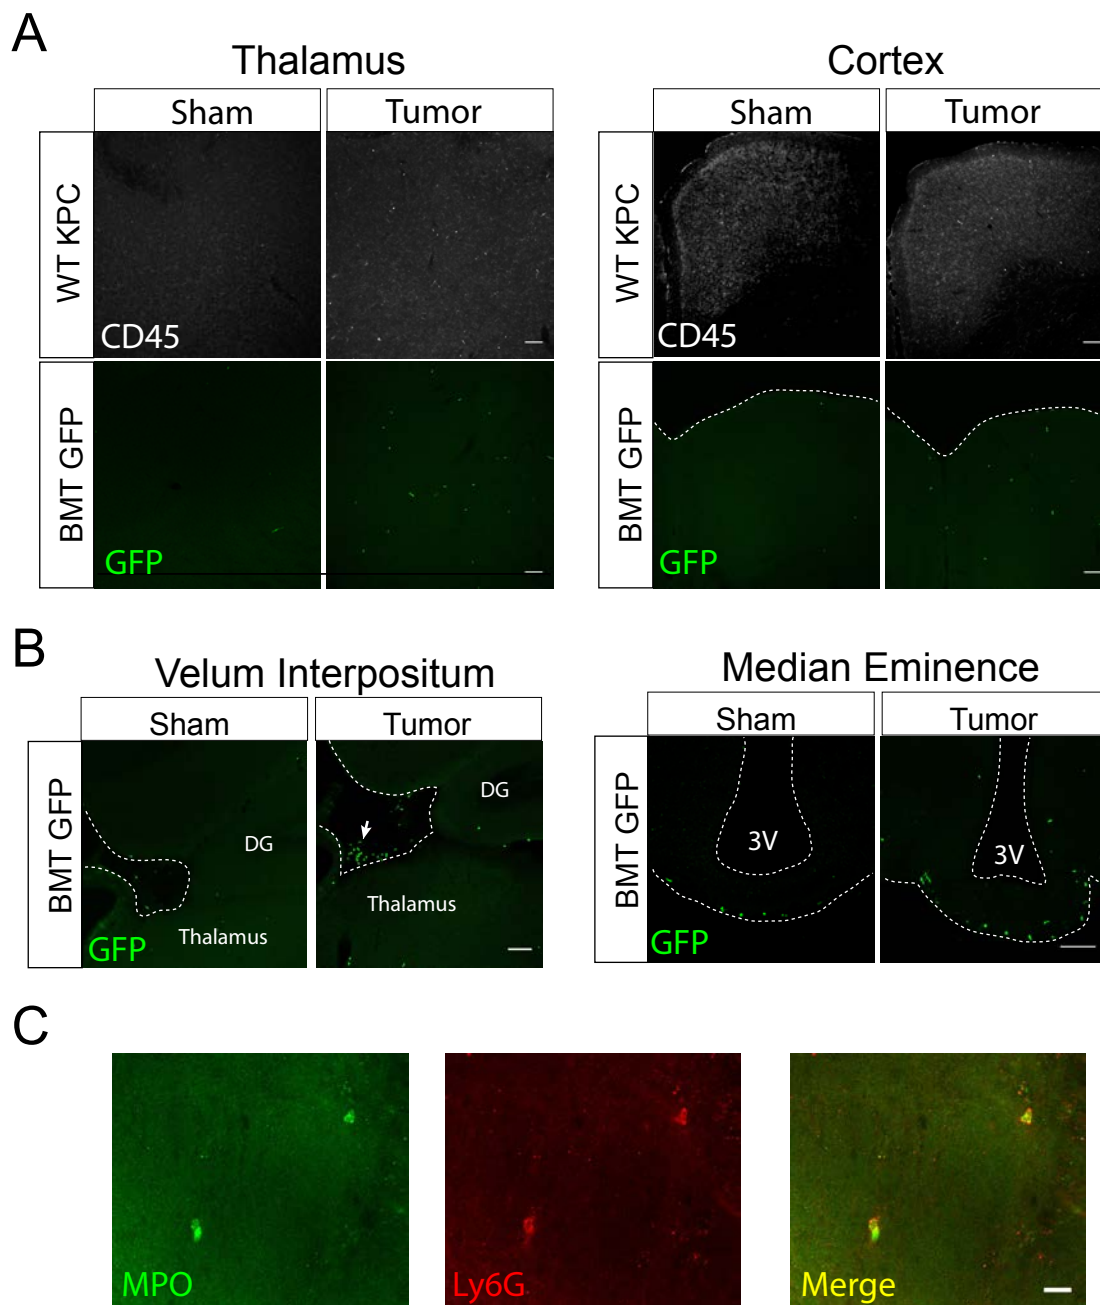

270

271 **Figure 2 – Figure Supplement 1. Immunofluorescence analysis of**  
272 **infiltrating immune cells during PDAC** A) 10X confocal images of thalamus  
273 and cortex from sham and tumor mouse brains, 10 d.p.i. WT KPC = WT animals,  
274 BMT GFP = Ly5.1 eGFP marrow transplanted into WT recipient after treosulfan  
275 conditioning to ablate marrow (see Methods). Scale bar = 100  $\mu$ m. B) 10X (VI)

276 and 20X (ME) confocal images of VI and ME from sham and tumor (10 d.p.i.)  
277 mice. In images of the VI, dashed line denotes edge of parenchyma and  
278 beginning of meninges. Arrow = cluster of infiltrating GFP+ immune cells in the VI  
279 meninges. DG = dentate gyrus. 3V = third ventricle. Scale bars = 100  $\mu$ m. C) 40X  
280 confocal image of thalamus from tumor mouse, 12 d.p.i. Scale bar = 20  $\mu$ m.

281

282 We verified the presence of meninges in the VI with ER-TR7 labeling,  
283 which showed infiltrating neutrophils in the VI meninges in tumor mice (Figure 2 –  
284 figure supplement 2A). Neutrophils in the VI were degranulating, with MPO  
285 “blebs” present at the edge of many cells, along with extracellular MPO (Figure 2  
286 – figure supplement 2C). This phenomenon was only present in brains of tumor  
287 animals and not in brains of sham animals. We were able to confirm neutrophil  
288 identity with the plasma membrane marker Ly6G and globoid morphology (Figure  
289 2 – figure supplement 1C). Neutrophil extracellular traps (NETs) were also  
290 present in the VI, as identified by citrillunated histone H3 and MPO co-labeling  
291 (Fig. 2G). We were unable to perform quantification on the number of NETs  
292 present in tumor mouse brains, due to the transient nature of these events.

293 In the CNS parenchyma, especially in the thalamus and cortex, we  
294 frequently observed neutrophils undergoing phagocytosis by microglia, with Iba-  
295 1+ cells extending processes around MPO+ neutrophils (Fig. 2H). This supports  
296 previous studies showing that microglia protect the CNS parenchyma from  
297 neutrophil invasion during various states of inflammation (Jens Neumann et al.,  
298 2018; J. Neumann et al., 2008; Otxoa-de-Amezaga et al., 2018).



299           The peripheral origin of the CD45+ globoid cells in the brain was assessed  
300 using our GFP BMT mice. Sham BMT mice showed very few GFP+ cells in the  
301 brain, including the cortex and thalamus (Fig. S2A), as well as the meninges  
302 (data not shown). In contrast, there was a large increase in GFP+ cells in the  
303 brains of KPC mice at 10 d.p.i. We observed a pattern of infiltrating GFP+ cells  
304 that was identical to CD45+ globoid cells in our previous experiments, with  
305 scattered GFP+ cells in the cortex and thalamus (Figure 2 – figure supplement  
306 1A and B), and accumulations of GFP+ cells in the VI and ME (Figure 2 – figure  
307 supplement 2D and F). In agreement with our previous data, GFP+ cells were  
308 MPO+ in the VI (Fig. 2I), but not in the meninges of the ME (Figure 2 – figure  
309 supplement 2D). Most of the GFP+ cells in the ME were Iba-1+ (Figure 2 – figure  
310 supplement 2F), suggesting these cells were infiltrating monocytes that  
311 differentiated into meningeal macrophages. However, we did not observe any  
312 GFP+Iba-1+ cells in the CNS parenchyma.

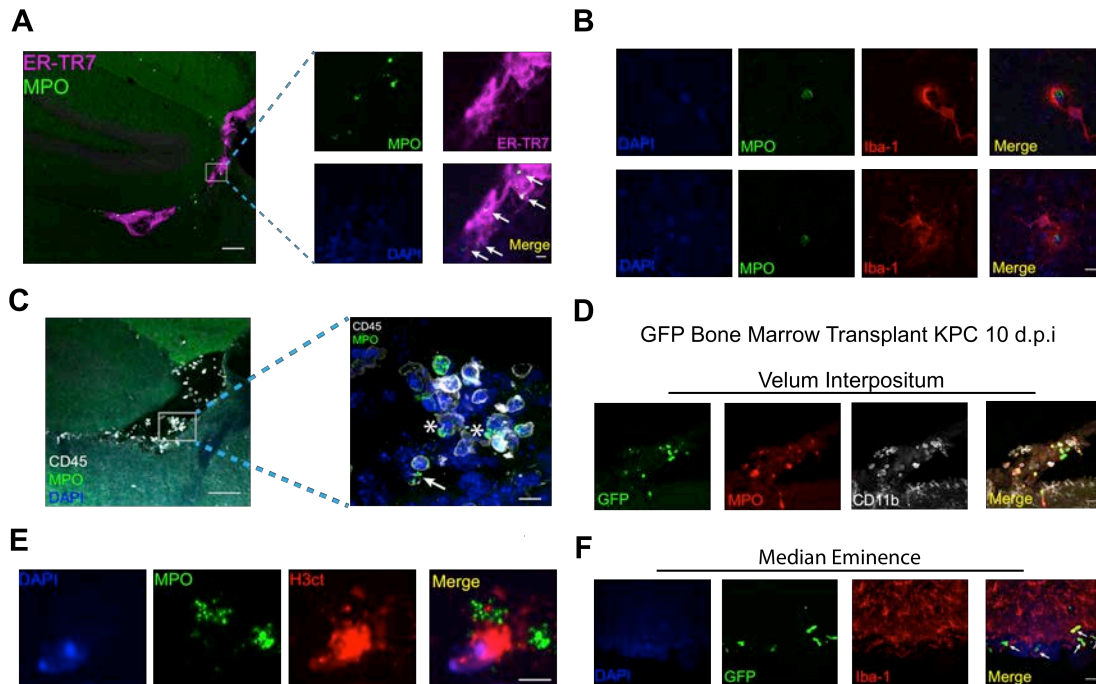

313

314 **Figure 2 – Figure Supplement 2. Characteristics of brain-infiltrating immune**  
 315 **cells during PDAC.** A) Representative 10X image of VI from the brain of a tumor  
 316 animal 10 d.p.i., showing ER-TR7 staining to label meninges and MPO staining  
 317 to label neutrophils. Scale bar = 100  $\mu$ m. Inset = 60X showing neutrophils  
 318 (indicated by arrows) within the meninges of the VI. Scale bar = 10  $\mu$ m. B) 20X  
 319 image a VI with 60X inset showing neutrophils degranulating. Asterisk =  
 320 myeloperoxidase “blebs” coming off neutrophil. Arrow = extracellular  
 321 myeloperoxidase. C) 60X image of neutrophil extracellular trap in the VI of a  
 322 tumor animal, 10 d.p.i. Scale bar = 5  $\mu$ m. D) Representative 60X images of  
 323 microglia phagocytosing neutrophils in the thalamus of animals with KPC tumor,  
 324 10 d.p.i. Scale bar = 10  $\mu$ m. E & F) Representative 60X images of VI and ME,  
 325 respectively, from BMT GFP tumor mice, at 10 d.p.i. Scale bars = 20  $\mu$ m. Arrows  
 326 = GFP+Iba-1+ infiltrating macrophages.

327

328           Since we observed myeloid cell infiltration near brain regions important for  
329 behavioral and cognitive performance, we performed behavioral and cognitive  
330 tests on PDAC tumor mice to determine if these mice experienced altered  
331 anxiety levels or cognitive dysfunction (Figure 2 – Figure supplement 3). We  
332 observed that while PDAC tumor did not display cognitive dysfunction, they did  
333 spend significantly less time in the more anxiety-provoking center of the arena  
334 compared to sham mice, indicative of anxiety-like behavior, which confirms  
335 previous studies demonstrating anxiety during cancer (Campos et al., 2017)  
336 (Figure 2 – Figure supplement 3B-E).

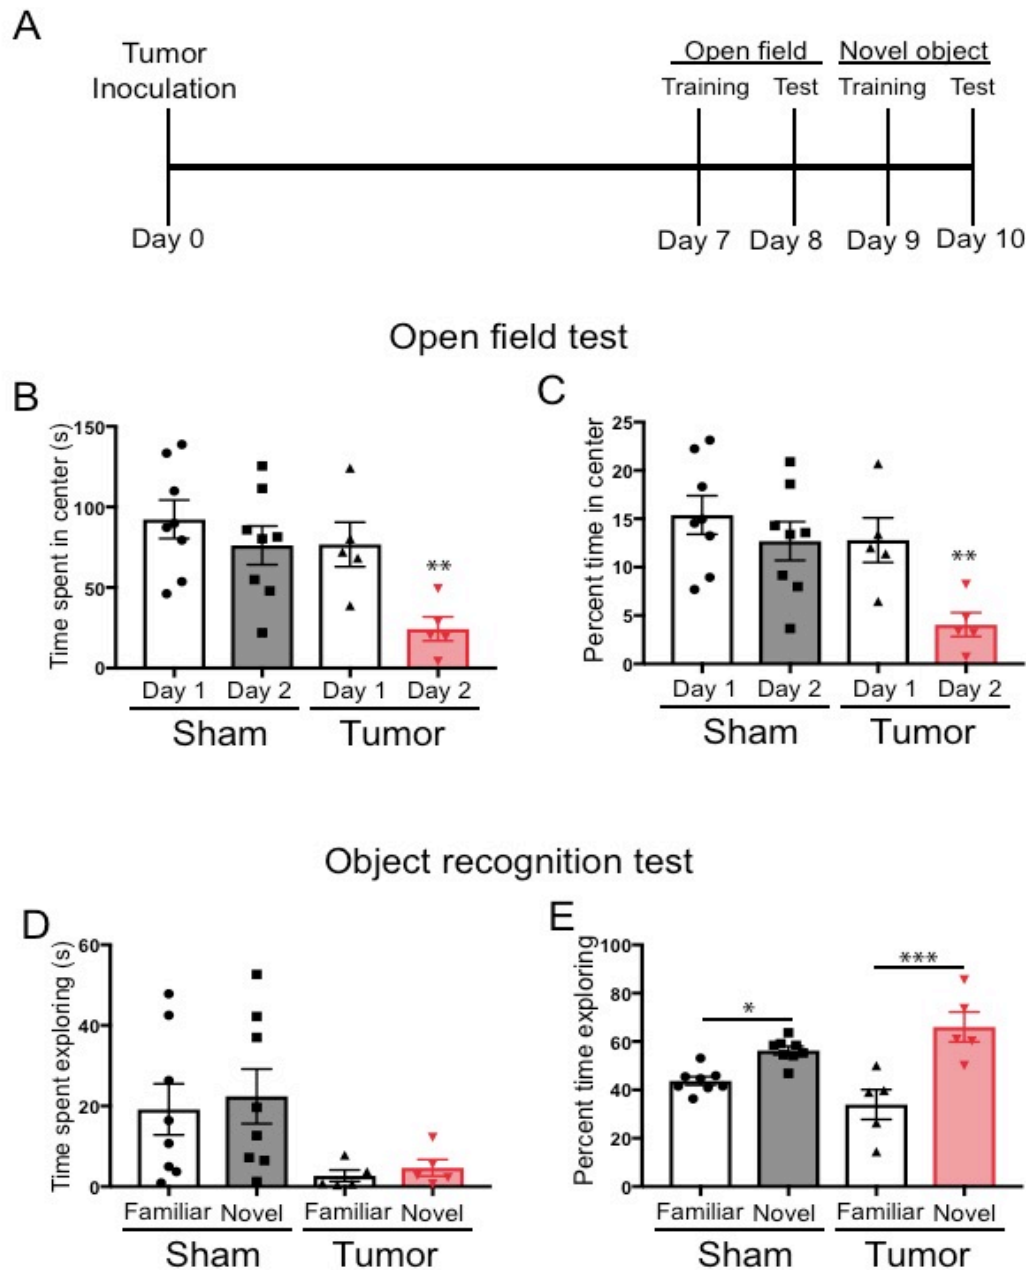

337

338 **Figure 2 – Figure Supplement 3. Cognitive performance of KPC tumor mice.**

339 A) Illustration depicting timeline of behavioral tests. B) Total time spent in center

340 of arena during open field test on the first and second day of testing. Overall, we

341 observed that tumor mice were significantly less mobile than sham mice in the

342 open field (Fig. S3B and D), which is consistent with our previous home cage

343 locomotor activity analysis showing that KPC tumor mice exhibit decreased  
344 activity throughout the course of disease (Michaelis et al., 2017).C) Percent of  
345 total time that was spent in the center of the arena during the first and second  
346 day of the open field test. For B and D,  $**P < 0.01$ , student's t-test comparing  
347 sham day 2 to tumor day 2. D) Total time spent investigating the familiar or the  
348 novel object. E) Percent of total time spent exploring the familiar object and the  
349 novel object.  $*P < 0.05$ ,  $***P < 0.001$ , Bonferroni post-hoc analysis in two-way  
350 ANOVA. For all panels,  $n = 8$  sham mice and  $n = 5$  tumor mice. Three tumor  
351 animals were excluded from all analyses due to complete lack of movement.  
352 Data are presented as mean  $\pm$  s.e.m.

353

354

### 355 **The CCR2-CCL2 axis is activated in the CNS during PDAC**

356 Since *Ccl2* transcript showed the largest difference in induction between  
357 hippocampus and liver (17.1-fold vs. 3.6-fold) of all the chemokine transcripts we  
358 measured (with similar baseline levels of *Ccl2* expression, data not shown), and  
359 previous studies demonstrated the importance of CCR2/CCL2 for myeloid cell  
360 chemotaxis to the brain (Cazareth, Guyon, Heurteaux, Chabry, & Petit-Paitel,  
361 2014; D'Mello et al., 2009), and PDAC cachexia in humans (Talbert et al., 2018),  
362 we chose to focus on the CCR2-CCL2 axis.

363 Using *in situ* hybridization we localized robust CCL2 mRNA expression  
364 exclusively within the VI during PDAC. There was no observable *Ccl2* mRNA in  
365 the brains of sham animals (Fig. 3B). We verified these results at the protein

366 level using CCL2<sup>mCherry</sup> mice, which showed abundant CCL2 protein expression  
367 in the VI in tumor animals at 10 d.p.i., exclusively expressed in Iba1+CD206+  
368 meningeal macrophages. CCL2 protein was not expressed in VI meningeal  
369 macrophages in sham mice (Fig. 3C). We did not observe robust CCL2 protein  
370 expression in any other locations in the brain.

371 CCR2<sup>RFP/WT</sup> reporter mice were used to localize CCR2+ cells in the CNS.  
372 We observed that, at 10 d.p.i., CCR2+ immune cells infiltrated the brains of tumor  
373 mice and accumulated in the VI (Fig. 3D-F) Interestingly, a large percentage of  
374 neutrophils in the VI were CCR2+ (Fig. 3E), which infiltrated throughout the VI  
375 and often formed large aggregates consisting of 20 cells or more (Fig 3 – Figure  
376 Supplement 1A). CCR2+ cells were sparse or absent in other brain regions,  
377 particularly within the parenchyma, in tumor mice.

378 In order to verify CCR2 expression on neutrophils in the brains of tumor-  
379 bearing animals, we performed flow cytometry for CCR2 (using an anti-CCR2  
380 antibody) on Ly6G+ circulating, liver-infiltrating, and brain-infiltrating neutrophils  
381 in both sham and PDAC-bearing animals at 10 d.p.i. As expected, we observed  
382 minimal CCR2 expression on circulating neutrophils in sham animals. While  
383 there was a slight increase in circulating CCR2+ neutrophils in tumor-bearing  
384 animals, there was no increase in CCR2+ neutrophils in the liver. Alternatively,  
385 there was a large increase in CCR2+ neutrophils in the brains of tumor-bearing  
386 animals (Fig 3 – Figure Supplement 1).

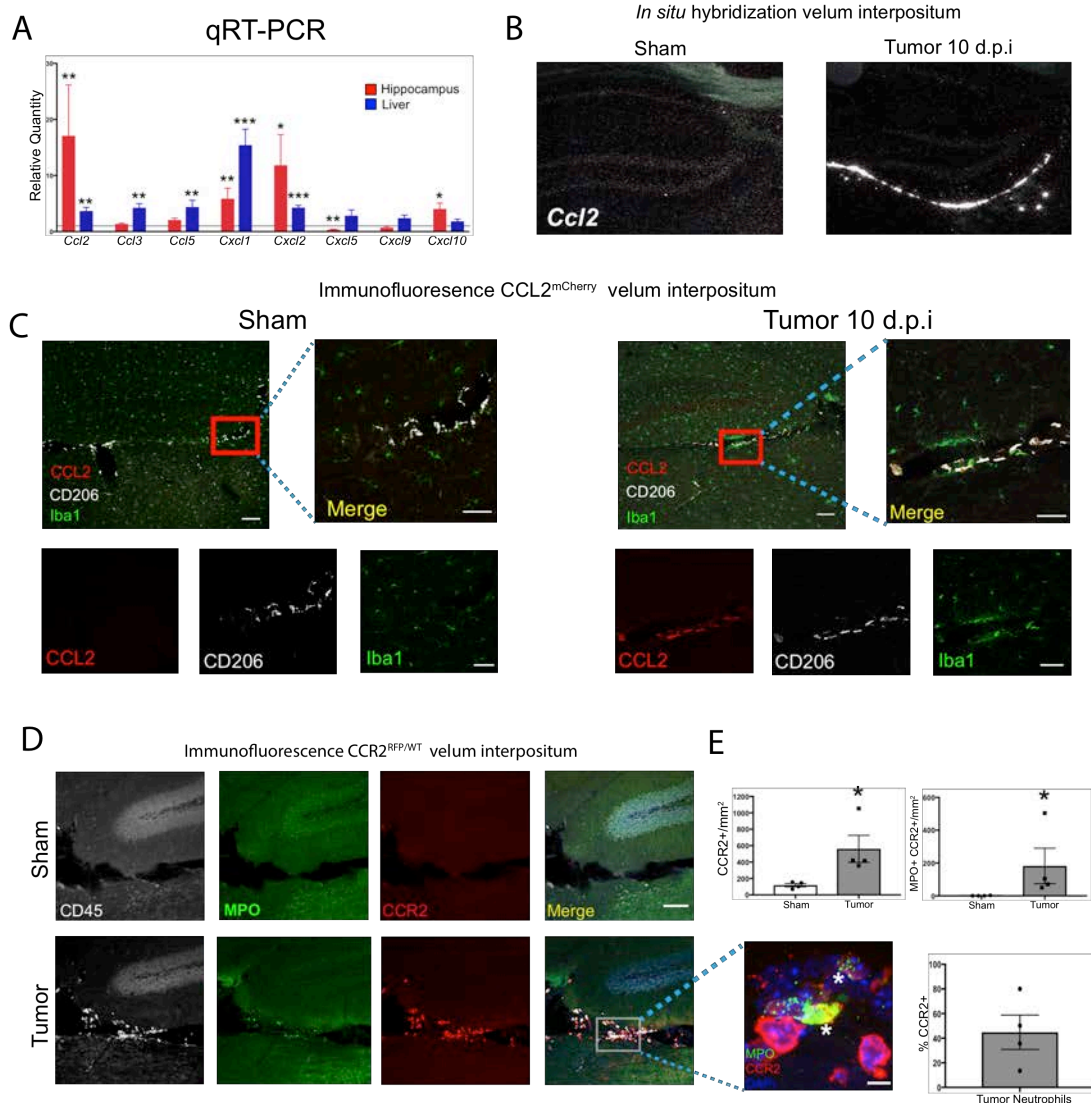

387

388 **Figure 3: The CCR2-CCL2 axis is activated in the CNS during PDAC. A)**

389 qRT-PCR for select chemokine transcripts from dissected hippocampi and liver

390 from tumor and sham animals 10 d.p.i. Values are tumor relative to sham. \**P* <

391 0.05, \*\**P* < 0.01, \*\*\**P* < 0.001 comparing tumor vs. sham within the same tissue

392 type in student's t-test. *n* = 5/group. Results are representative of two

393 independent experiments. B) Representative darkfield microscopy image of *in*

394 *situ* hybridization for CCL2 in sham and tumor (10 d.p.i) mouse brains. C)

395 Representative 10X confocal microscopy image of brain from CCL2<sup>mCherry</sup> tumor



396 mouse brain, 10 d.p.i. Scale bar = 100  $\mu$ m. Inset of VI shows CCL2 protein  
397 expression is confined to meningeal macrophages, identified by CD206 labeling.  
398 Scale bar = 20  $\mu$ m. D) Representative 20X confocal microscopy image of brain  
399 from CCR2<sup>RFP/WT</sup> tumor (10 d.p.i.) and sham mouse brain. Scale bar = 100  $\mu$ m.  
400 Inset = 60X image identifying CCR2+ neutrophils in the VI of a tumor animal,  
401 indicated by asterisks. Scale bar = 5  $\mu$ m. E) Quantification of different RFP+ cell  
402 populations in the VI of CCR2<sup>RFP/WT</sup> tumor (10 d.p.i.) and sham animals.  $n$  =  
403 4/group. \* $P$  < 0.05, Mann-Whitney U-test comparing sham to tumor. Results are  
404 representative of two independent experiments.

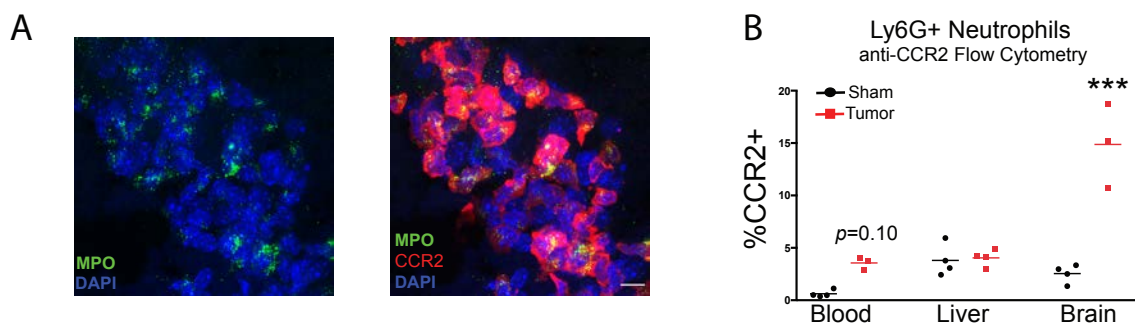

405

406 **Figure 3 – Figure Supplement 1. Neutrophils in the Velum Interpositum**  
407 **Express CCR2 during PDAC.** A) 60X image identifying cluster of CCR2+  
408 neutrophils in the VI of a tumor animal. Scale bar = 10  $\mu$ m. B) Flow cytometry  
409 analysis of CCR2+ neutrophils in the blood, brain, and liver of sham and tumor  
410 animals, 10 d.p.i. Neutrophils defined as live, CD45<sup>high</sup>CD11b+Ly6G+ cells.  
411 CCR2+ neutrophils identified by AF647 anti-CCR2 labeling compared to AF647  
412 isotype control.  $n$  = 3-4/group. \*\*\* $P$  < 0.001 in repeated measures one-way  
413 ANOVA compared to sham. Bars denote mean. Results are representative of two  
414 independent experiments.



415

416           Based on our data showing that CCR2 is a brain-specific chemotactic  
417 receptor for neutrophils during PDAC, we hypothesized that brain-infiltrating  
418 neutrophils are unique compared to neutrophils that infiltrate other organs. In  
419 order to characterize the phenotype of brain-infiltrating neutrophils during PDAC,  
420 we performed RNA sequencing (RNAseq) on FACS-sorted neutrophils from  
421 blood, liver, tumor, and brain during PDAC at 10 d.p.i, as well as circulating  
422 neutrophils from sham animals (Figure 3 – Figure Supplement 2A and F).  
423 Principal component analysis of individual samples based on the top 500 most  
424 varying transcripts revealed that brain-infiltrating neutrophils clustered tightly  
425 together, but were distinct from those in liver, tumor, and blood (Figure 3 – Figure  
426 Supplement 2B). Furthermore, we were able to identify over 100 transcripts that  
427 were differentially expressed in the brain-infiltrating neutrophils compared to  
428 those in the liver, tumor, and circulation (Figure 3 – Figure Supplement 2C-E  
429 and Figure Supplement 3).

430           Taken together, these data indicate that the CCR2-CCL2 axis is activated  
431 in the CNS during PDAC, and that the CNS microenvironment uniquely  
432 influences the neutrophil transcriptome during PDAC.

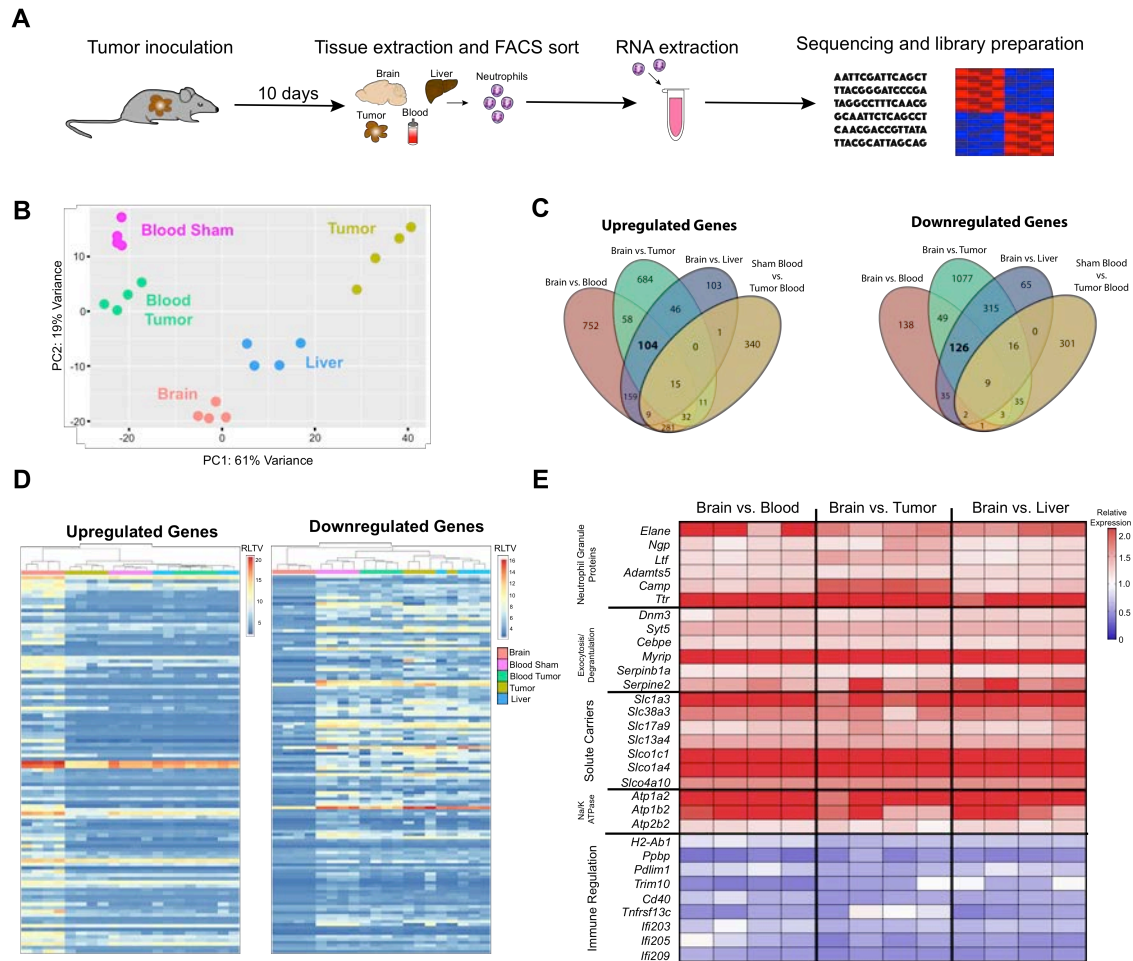

433

434 **Figure 3 – Figure Supplement 2. Brain-infiltrating neutrophils express a**

435 **unique transcriptome during PDAC.** A) Workflow for neutrophil isolation, RNA

436 extraction, and RNAseq analysis. B) Principle component analysis of 500 most

437 varying genes in neutrophils isolated from blood, tumor, liver, and brain from

438 mice with PDAC at 10 d.p.i., as well as blood from sham mice. C) Venn diagram

439 of different comparisons of transcripts expressed in neutrophils from different

440 organs. D) We identified putative “brain-specific” transcripts by comparing the

441 transcriptome of brain-infiltrating neutrophils to that of liver- and tumor-infiltrating

442 neutrophils, as well as circulating neutrophils (all from tumor animals). In order to

443 control for the nonspecific effects of malignancy on circulating neutrophils, we

444 any excluded transcripts that were upregulated in circulating neutrophils from  
445 tumor animals compared to circulating neutrophils from sham animals. Using this  
446 approach, we identified 104 upregulated and 126 downregulated “brain-specific”  
447 transcripts RLTV = regularized logarithm transformed value. E) Heatmap of  
448 select brain-specific transcripts showing relative expression, comparing average  
449 of brain neutrophils to neutrophils in different organs. Functional enrichment  
450 analysis (based on Gene Ontology curation) of brain-specific transcripts identified  
451 enrichment for the term “extracellular space” (GO:0005615) in upregulated genes  
452 and enrichment for the terms “external side of plasma membrane”  
453 (GO:0009897), “immune response” (GO:0006955), and “response to interferon-  
454 gamma” (GO: 00034341) in downregulated genes. Several brain-specific  
455 upregulated transcripts encoded neutrophil granule components and enzymes,  
456 such as neutrophil granule protein (*Ngp*), the metalloproteinase ADAMTS5  
457 (*Adamts5*) neutrophil elastase (*Elane*), lactoferrin (*Ltf*), cathelicidin antimicrobial  
458 peptide (*Camp*), and transthyretin (*Ttr*), as well as proteins important for granule  
459 secretion and NET formation such as dynamin 3 (*Dnm3*), synaptotagmin 15  
460 (*Syt15*), Serpinb1a (*Serpinb1a*), Serpin Family E Member 2 (*Serpine2*), C/EBP $\epsilon$   
461 (*Cebpe*) (Gombart et al., 2003), and Myosin VIIA And Rab Interacting Protein  
462 (*Myrip*) (Desnos et al., 2003). We also observed an increase in genes for solute  
463 carriers (*Slc* gene family) and components of the Na/K ATPase, suggesting  
464 brain-infiltrating neutrophils are highly metabolically active. Many brain-specific  
465 downregulated transcripts encoded proteins important for immune function and  
466 responsiveness to T-cell-derived cytokines, such as MHC II (*H2-Ab1*), CXCL7

467 (*Ppbb*), PDLIM1 (*Pdlim1*, a negative regulator of NF $\kappa$ B signaling), and the  
 468 interferon-inducible genes *Ifi203*, *Ifi205*, and *Ifi209*.

469

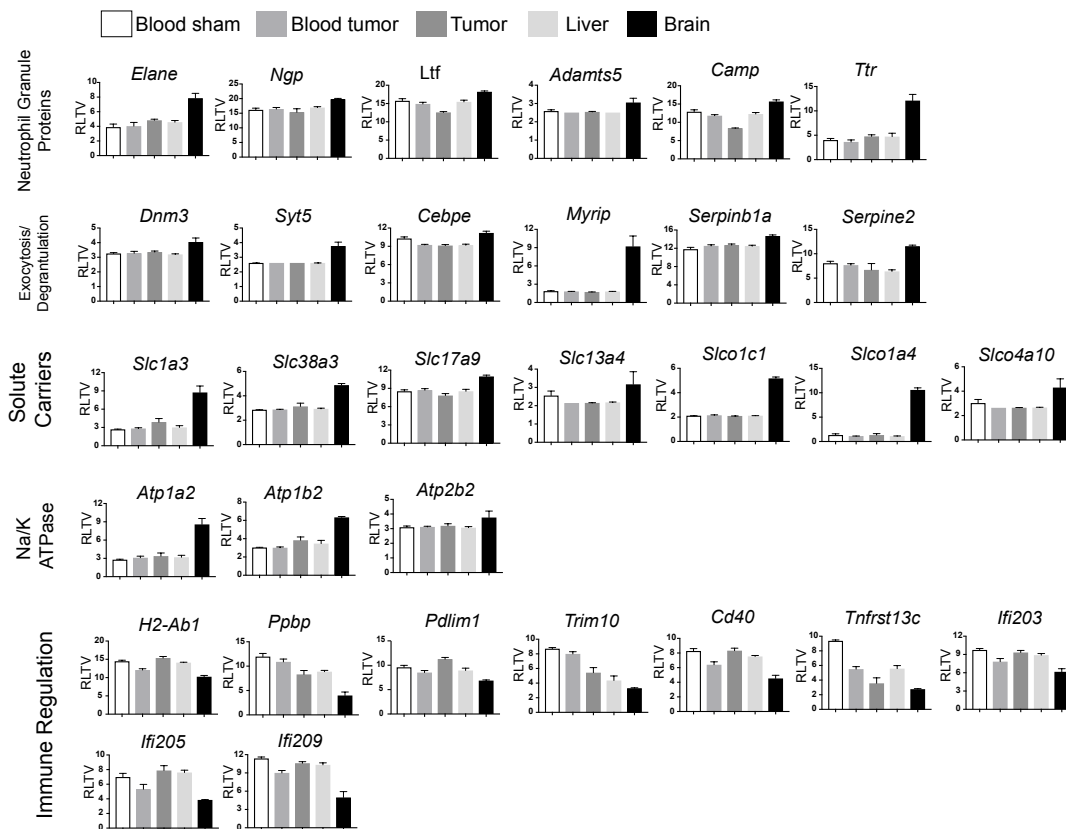

470

471 **Figure 3 – Figure Supplement 3. Expression of neutrophil ‘brain-specific’**  
 472 **transcripts.** Normalized expression values of transcripts depicted in heatmap in  
 473 Figure 7e. RLTV = regularized logarithm transformed value.

474

475 **CCR2 is critical for neutrophil accumulation at CNS interfaces, anorexia,**  
 476 **and muscle catabolism during PDAC**

477 Based on our findings that CCR2+ cells infiltrate the brain during PDAC,  
 478 we hypothesized that CCR2 is required for immune cell recruitment to the brain.

479 We observed that at 11 d.p.i., there was a 37% decrease in total CD45<sup>high</sup>  
480 myeloid cells in the brains of CCR2KO tumor mice compared to WT tumor mice  
481 (Fig. 4A and B). This difference was primarily driven by a large decrease in  
482 brain-infiltrating neutrophils in CCR2KO tumor mice, and to a much lesser extent  
483 a decrease brain-infiltrating Ly6C<sup>high</sup> monocytes in CCR2KO tumor mice  
484 compared to WT tumor mice. There was a decrease in neutrophils (and again  
485 Ly6C<sup>high</sup> monocytes, to a lesser extent) as a percentage of the CD45<sup>high</sup> cells in  
486 the brain in CCR2KO tumor mice, indicating that the differences were not due to  
487 a global decrease in infiltrating immune cells (Fig. 4B). This was also supported  
488 by the fact that there were no differences in microglia (data not shown), Ly6C<sup>low</sup>  
489 monocytes, or T-cells in the brains of CCR2KO tumor mice compared to WT  
490 tumor mice (Fig. 4C).

491         Since CCR2<sup>+</sup> immune cells, particularly neutrophils, in the brains of tumor  
492 mice localized primarily to the VI, we hypothesized that there would be a  
493 decrease in immune cells in the VI in CCR2KO tumor animals. Indeed, we  
494 observed a dramatic decrease in both total CD45<sup>+</sup> globoid and MPO<sup>+</sup> immune  
495 cells in the VI in CCR2KO tumor mice compared to WT tumor mice (Fig. 4D and  
496 E).

497         We previously demonstrated that KPC-bearing animals experienced  
498 robust anorexia and muscle catabolism (Michaelis et al., 2017), which our lab  
499 and others showed are driven by CNS inflammation (T. P. Braun et al., 2011;  
500 Laye et al., 2000). We observed that CCR2 knockout (CCR2KO) mice had  
501 decreased anorexia during PDAC compared to WT tumor mice (Fig. 4A).

502 CCR2KO tumor mice also had attenuated muscle loss compared to WT tumor  
 503 mice (Fig. 6B). To determine whether the decreased muscle mass loss in  
 504 CCR2KO mice was due to decreased muscle proteolysis, we assessed levels of  
 505 transcripts key for muscle proteolysis in the gastrocnemius, including *Mafbx*,  
 506 *Murf1*, and *Foxo1*, which we previously showed are induced by CNS  
 507 inflammation (T. P. Braun et al., 2011). We observed that, compared to WT  
 508 tumor animals, CCR2KO tumor animals had decreased induction of *Murf1* and  
 509 *Foxo1* (Fig. 4C), confirming that there was decreased muscle catabolism in  
 510 CCR2KO tumor mice.

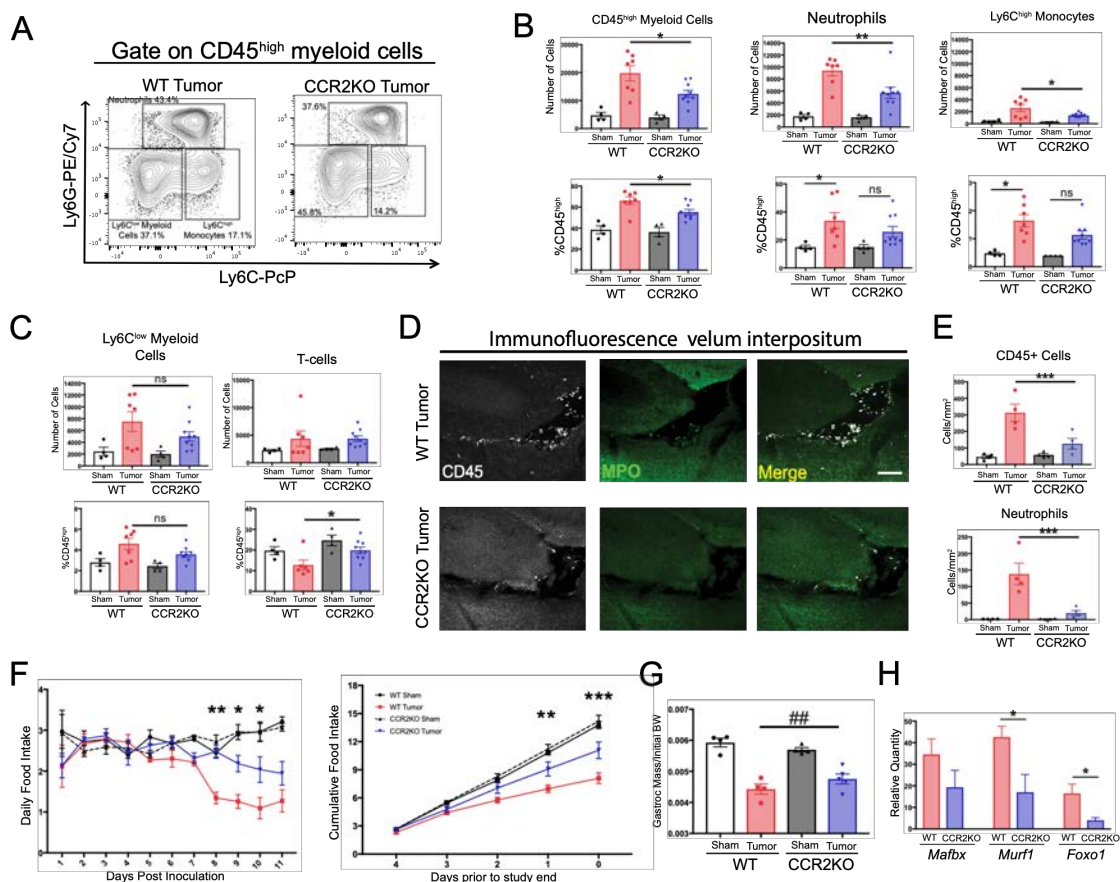

511

512 **Figure 4. The CCR2-CCL2 axis in the CNS is critical for brain inflammation,**  
513 **anorexia, and muscle catabolism during PDAC.** A) Representative plot of  
514 different CD45<sup>high</sup> myeloid cell populations from WT and CCR2KO tumor animal  
515 brains, 11 d.p.i. Cells are gated on live, singlet, CD45+, CD45<sup>high</sup>CD11b+ cells. B  
516 and C) Flow cytometry analysis of immune cells isolated from whole brain  
517 homogenate. \* $P < 0.05$ , \*\* $P < 0.01$ , WT tumor vs. CCR2KO tumor, or tumor vs.  
518 sham in the same genotype in Bonferroni *post hoc* analysis in two-way ANOVA.  
519 ns = not significant.  $n = 4-9$ /group. Data consist of two independent experiments  
520 pooled ( $n =$  at least 2/group in each experiment). D) Representative 20X confocal  
521 microscopy images of the VI from WT tumor and CCR2KO tumor brain, 10 d.p.i.  
522 Scale bar = 100  $\mu\text{m}$ . E) Quantification of total CD45+ globoid cells and MPO+  
523 neutrophils in the VI of WT and CCR2KO tumor and sham animals, 10 d.p.i. \*\*\* $P$   
524  $< 0.001$ , WT tumor vs. CCR2KO tumor in Bonferroni *post hoc* analysis in two-  
525 way ANOVA.  $n = 4$ /group. F) Daily food intake (left) and final 5 days of the study  
526 (right, starting when animals develop symptoms) in WT and CCR2KO tumor and  
527 sham mice. \* $P < 0.05$ , \*\* $P < 0.01$ , \*\*\* $P < 0.001$  comparing WT tumor vs.  
528 CCR2KO tumor in Bonferroni *post hoc* analysis in two-way ANOVA.  $n = 4/5$  per  
529 group. Results are representative of three independent experiments. G) Left =  
530 mass of dissected gastrocnemius, normalized to initial body weight, at 11 d.p.i.  
531 ### $P < 0.01$  for interaction effect between genotype and tumor status in two-Way  
532 ANOVA analysis. H) qRT-PCR analysis of *Mafbx*, *Murf1*, and *Foxo1* from RNA  
533 extracted from gastrocnemii dissected at 11 d.p.i. Values normalized to those



534 from WT sham. \* $P < 0.05$ , WT tumor vs. CCR2KO tumor dCt values.  $n = 3$ -  
535 5/group.

536

537 Since CCR2 deletion was not brain specific in the CCR2KO mice, we  
538 performed an extensive analysis of infiltrating immune cells in other organs (Fig.  
539 4 – Figure Supplement 1). We observed minimal changes in immune cell  
540 composition in the blood, liver, and tumor in CCR2KO tumor mice compared to  
541 WT tumor mice. We only observed a decrease in circulating Ly6C<sup>high</sup> monocytes  
542 in CCR2KO tumor mice (Fig. 4 – Figure Supplement 1G). When we assessed  
543 neutrophils in CCR2KO tumor mice in different organs as a percentage of those  
544 in WT tumor mice, we found the largest decrease to be in the brain and observed  
545 a slight increase in circulating neutrophils in CCR2KO tumor mice compared to  
546 WT tumor mice (Fig. 4 – Figure Supplement 1F and H), suggesting that the  
547 decrease in brain-infiltrating neutrophils was due to a homing defect rather than  
548 inability to mobilize from the bone marrow. Therefore, our data show that CCR2  
549 is important for neutrophil recruitment specifically to the brain, and that the  
550 decrease in brain-infiltrating neutrophils was due to a homing defect rather than  
551 inability to mobilize from the bone marrow.



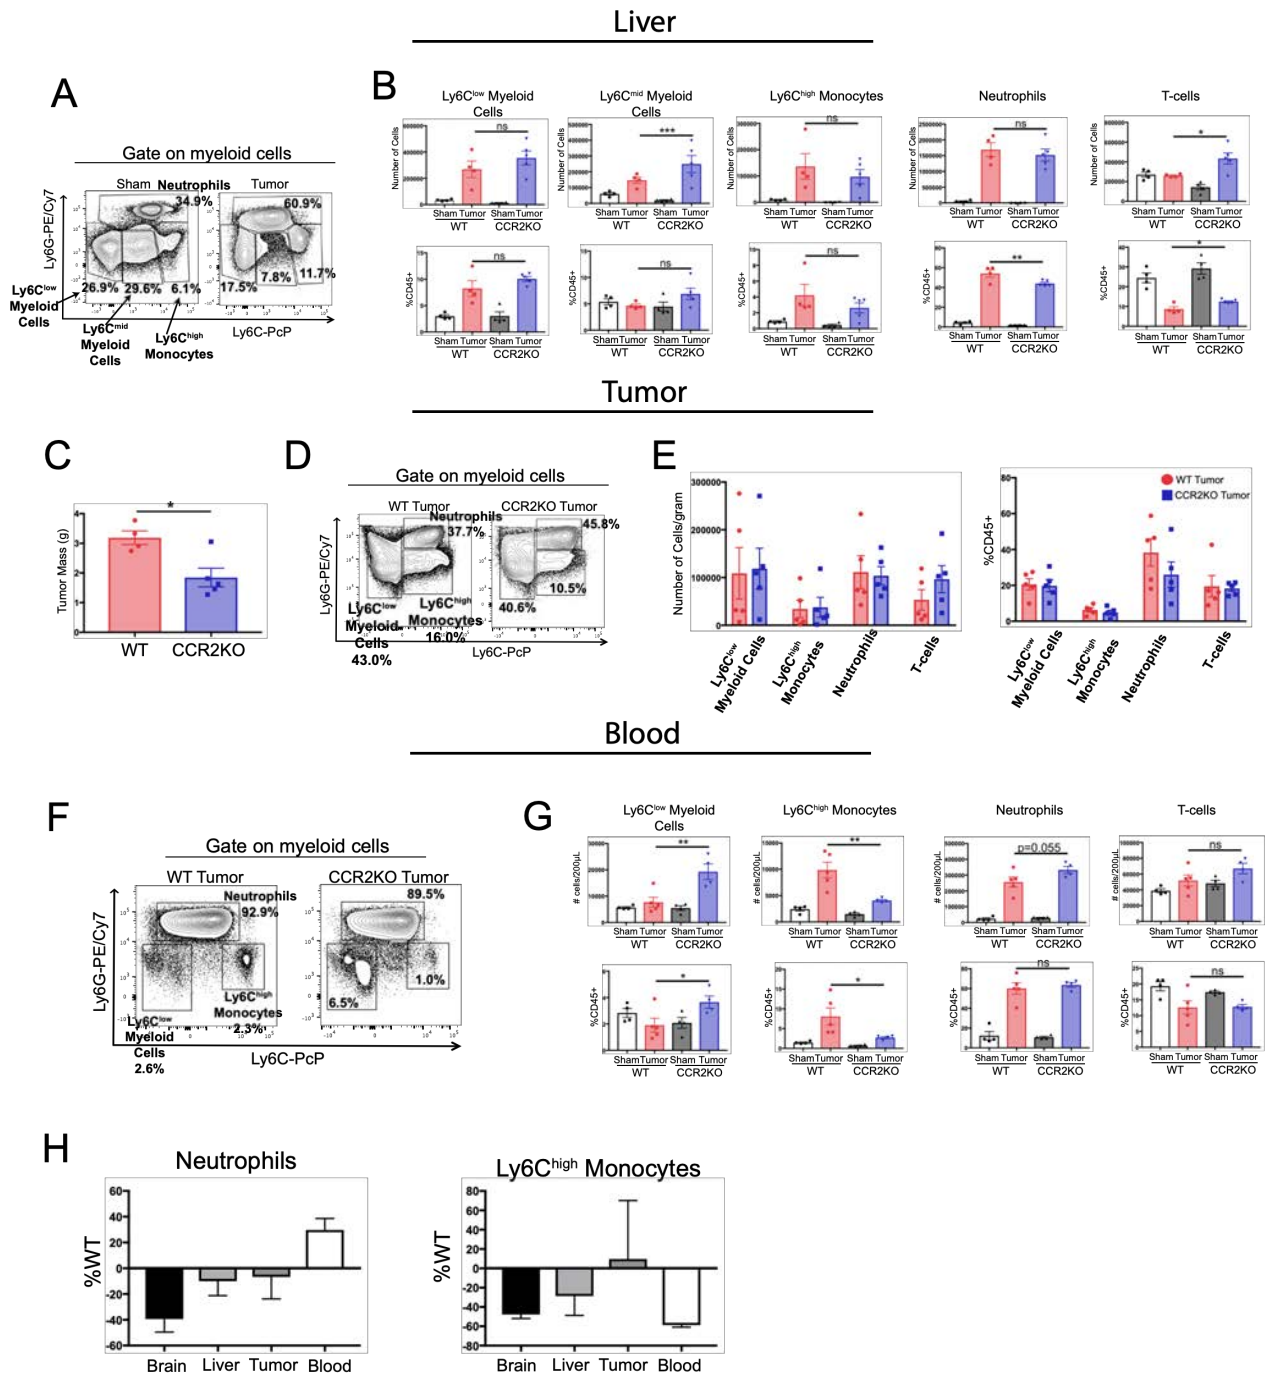

552

553 **Figure 4 – Figure Supplement 1. The CCR2-CCL2 axis is of selective**  
 554 **importance for the brain in PDAC cachexia.** A) Representative flow cytometry  
 555 plot of different myeloid cell populations from WT sham and tumor livers, 11  
 556 d.p.i., in order to illustrate different myeloid cell populations identified based on

557 Ly6C and Ly6G expression. Cells are gated on live, singlet CD45+CD11b+ cells.  
558 B) Quantification of flow cytometry analysis of different immune cell populations  
559 in the liver from WT and CCR2KO sham and tumor animals, 11 d.p.i. \* $P < 0.05$ ,  
560 \*\* $P < 0.01$ , WT tumor vs. CCR2KO tumor, or tumor vs. sham in the same  
561 genotype in Bonferroni *post hoc* analysis in two-way ANOVA. ns = not significant.  
562  $n = 4-9$ /group. C) Tumor mass from WT and CCR2KO animals, 11 d.p.i. Data are  
563 representative of three independent experiments. Data are presented as mean  $\pm$   
564 s.e.m. D) Representative flow cytometry plot of different myeloid cell populations  
565 from WT and CCR2KO tumors, 10 d.p.i. Cells are gated on live, singlet  
566 CD45+CD11b+ cells. E) Quantification of flow cytometry analysis of different  
567 immune cell populations isolated from tumor from WT and CCR2KO tumor  
568 animals, 10 d.p.i. Data consist of two independent experiments pooled ( $n =$  at  
569 least 2 per group per experiment). Data are presented as mean  $\pm$  s.e.m. F)  
570 Representative plot of different myeloid cell populations from WT and CCR2KO  
571 tumor animal blood, 10 d.p.i. Cells are gated on live, singlet CD45+CD11b+ cells.  
572 G) Quantification of flow cytometry analysis of different immune cell populations  
573 in the blood from WT and CCR2KO sham and tumor animals, 10 d.p.i. \* $P < 0.05$ ,  
574 \*\* $P < 0.01$ , WT tumor vs. CCR2KO tumor, or tumor vs. sham in the same  
575 genotype in Bonferroni *post hoc* analysis in two-way ANOVA. ns = not significant.  
576  $n = 4-5$ /group. Data are representative of two independent experiments. H)  
577 Analysis of neutrophils and Ly6C<sup>high</sup> monocytes in brain, liver, tumor, and blood  
578 in CCR2KO tumor mice, normalized to number in WT tumor mice.  $n = 5-9$ /group.  
579 . Lastly, although there was a 47% decrease in brain-infiltrating Ly6C<sup>high</sup>

580 monocytes in CCR2KO tumor mice compared to WT tumor mice, we also  
581 observed a 59% decrease in circulating Ly6C<sup>high</sup> monocytes, suggesting that,  
582 unlike neutrophils, the decrease in brain-infiltrating Ly6C<sup>high</sup> monocytes was in  
583 fact due to a defect in marrow extravasation.

584

585 Taken together, these data show that the CCR2-CCL2 axis required for  
586 myeloid cell recruitment specifically to the CNS during PDAC, and that this axis is  
587 important for development of anorexia and muscle catabolism.

588

### 589 **Blockade of P2RX7 in the CNS prevents immune cell infiltration into the** 590 **brain and attenuates cachexia during PDAC**

591 To evaluate the effects of CNS inflammatory responses during PDAC  
592 independent of potential systemic effects, we treated mice with  
593 intracerebroventricular (ICV) oxidized ATP (oATP). This potently blocks  
594 purinergic receptor P2RX7 signaling on brain resident macrophages. Signaling  
595 through this receptor is key for neutrophil recruitment to the brain during  
596 neuroinflammation (Roth et al., 2014). Animals were surgically implanted with  
597 indwelling lateral ventricle cannulas, then inoculated with KPC cells one week  
598 later. Mice received daily ICV injections of either 500 ng oATP or vehicle (aCSF),  
599 starting 3 d.p.i. (Fig. 5A). oATP treatment completely prevented both neutrophils  
600 and total CD45<sup>high</sup> myeloid cells from infiltrating the brain (Fig. 5B). Ly6C<sup>low</sup>  
601 myeloid cells and T-cells were not affected (Figure 5 – Figure supplement 1B).  
602 Furthermore, ICV oATP treatment did not affect any circulating immune cell

603 population (Figure 5 – Figure supplement 1C). When we investigated infiltrating  
604 immune cells in the VI, both CD45+ globoid cells and CD45+MPO+ neutrophils  
605 were completely absent in oATP-treated tumor animals, compared to large  
606 infiltrates in aCSF-treated tumor animals (Fig. 5C). While we did observe sparse  
607 CD45+ cells in the VI in oATP-treated tumor animals, they were not globoid and  
608 resembled meningeal macrophages. We also observed that oATP treatment  
609 attenuated anorexia in tumor mice (Fig. 5D). There was trend toward increased  
610 gastrocnemius mass ( $P = 0.09$ ) in oATP-treated tumor mice compared to aCSF-  
611 treated tumor bearing mice (Fig. 5E), which corresponded to a trend toward  
612 decreased induction of genes associated with proteolysis in gastrocnemius  
613 muscle (Fig. 5F), demonstrating that muscle catabolism was moderately  
614 attenuated by oATP administration directly into the brain. Tumor size in oATP-  
615 treated tumor mice was identical to that of aCSF-treated tumor mice (Figure 5 –  
616 Figure supplement 1A).

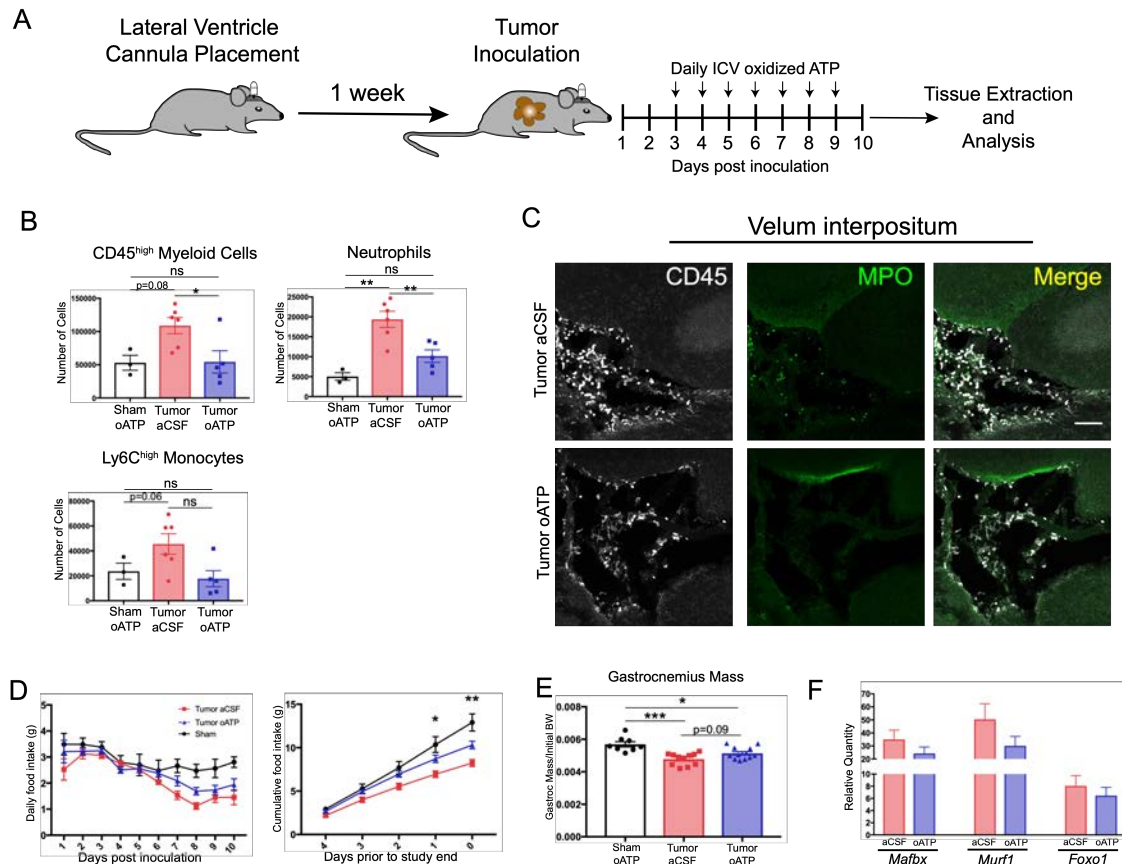

617  
618

**Figure 5. Intracerebroventricular administration of oxidized ATP prevents**

619

**immune cell recruitment to the brain and attenuates anorexia during PDAC.**

620

A) Diagram depicting workflow for lateral ventricle cannulation and ICV oATP

621

treatment during PDAC. ICV = intracerebroventricular. B) Quantification of

622

immune cells isolated from whole brain homogenate. \**P* < 0.05, \*\**P* < 0.01, in

623

Bonferroni *post hoc* analysis in two-way ANOVA. ns = not significant. *n* = 4-

624

7/group. C) Representative 20X confocal microscopy images of the VI from

625

aCSF-treated and oATP-treated tumor animals. Scale bar = 100 μm. D) Daily

626

food intake (left) and cumulative food intake for the final 5 days of the study

627

(right, starting when animals develop symptoms) \**P* < 0.05, \*\**P* < 0.01,

628

comparing aCSF tumor vs. oATP tumor in Bonferroni *post hoc* analysis in two-

629

way ANOVA. *n* = 8-12/group. Results consist of two independent experiments

630 pooled ( $n = 4-7$ /group in each experiment). E) Left = mass of dissected  
 631 gastrocnemius, normalized to initial body weight, at 10 d.p.i. F) qRT-PCR  
 632 analysis of *Mafbx*, *Murf1*, and *Foxo1* from RNA extracted from gastrocnemii  
 633 dissected at 8-10 d.p.i. Values normalized to those from sham oATP.  $n = 4-$   
 634  $7$ /group.  
 635

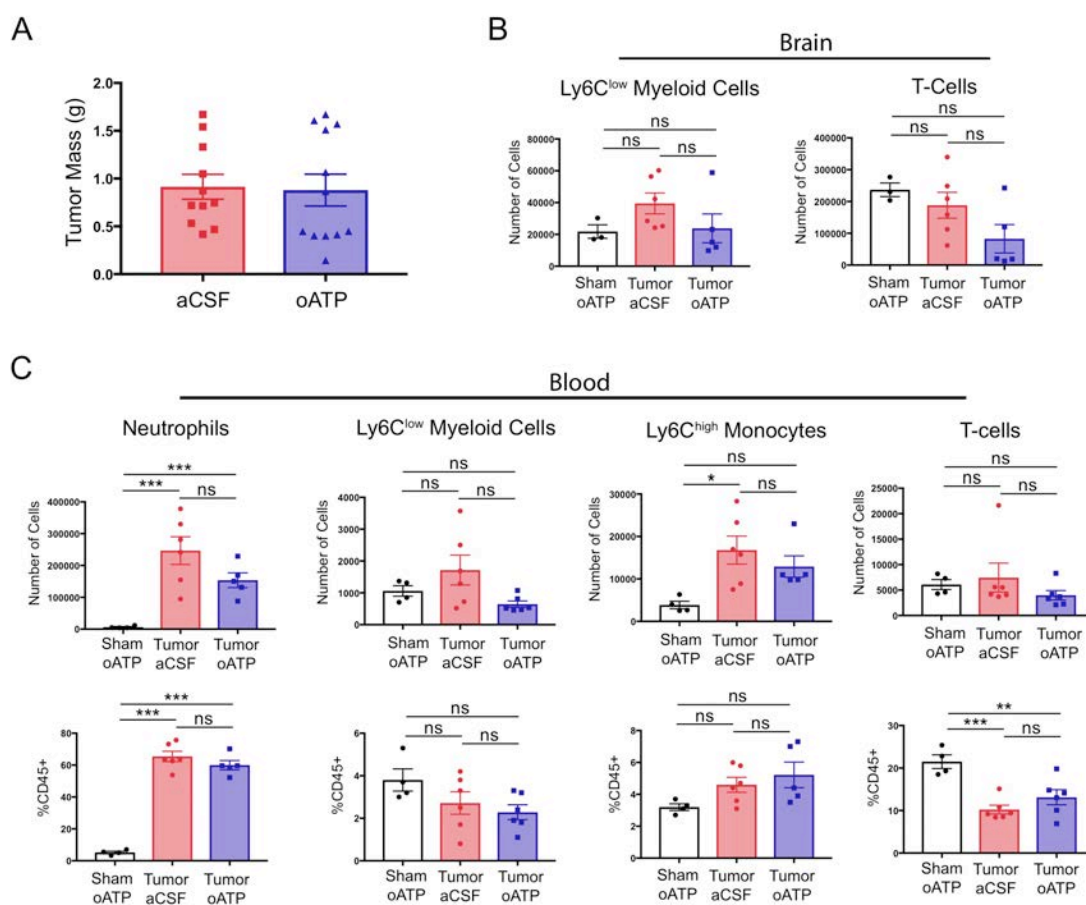

636

637 **Figure 5 – Figure Supplement 1. Intracerebroventricular antagonism of**  
 638 **P2RX7 does not affect systemic inflammation or tumor size during PDAC.**

639 A) Tumor mass from aCSF- and oATP-treated tumor-bearing mice, 8-10 d.p.i.  $n$   
 640 = 11-12/group. Results consist of two independent experiments pooled ( $n = 5-$

641 7/group in each experiment). B) Quantification of immune cells isolated from  
642 whole brain homogenate. ns = not significant in Bonferroni *post hoc* analysis in  
643 two-way ANOVA.  $n = 4-7$ /group. C) Quantification of immune cells isolated from  
644 blood, per 200  $\mu$ L of blood.  $*P < 0.05$ ,  $**P < 0.01$ ,  $***P < 0.001$  in Bonferroni *post*  
645 *hoc* analysis in two-way ANOVA. ns = not significant.  $n = 4-6$ /group.

646

647         Since ICV oATP antagonizes P2RX7 on brain macrophages, we  
648 investigated its effect on microglia. To quantify activation state we assessed  
649 microglia morphology in the hippocampus. We did not observe any differences in  
650 microglia size, Iba-1 staining area, and Iba-1 intensity per cell when comparing  
651 aCSF- or oATP-treated tumor animals to oATP-treated sham animals or each  
652 other (Figure 5 – Figure supplement 2). These results show that microglia  
653 activation state in the hippocampus is not affected by the presence of a  
654 pancreatic tumor or oATP administration to the brain.



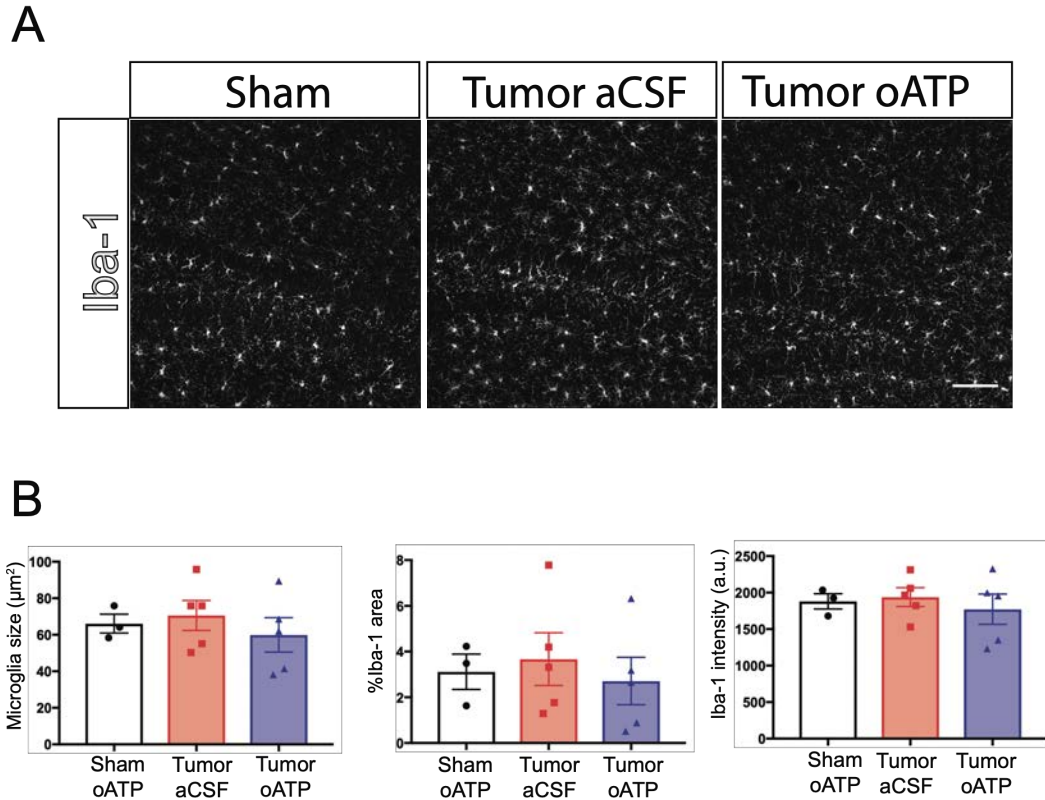

655

656 **Figure 5 – Figure Supplement 2. Intracerebroventricular administration of**

657 **oxidized ATP does not affect microglia activation during PDAC. A)**

658 Representative 20X images of Iba-1 immunofluorescence in the dentate gyrus,

659 10 d.p.i. Scale bar = 100 µm. B) Quantification of microglia morphology in the

660 dentate gyrus 10 d.p.i., showing mean microglia size (left), percent area covered

661 by Iba-1 immunofluorescence (middle), and mean Iba-1 fluorescent intensity per

662 microglia (right). a.u. = arbitrary units. *n* = 3-5/group.

663

664

665

666

667



## 668 **Discussion**

669         Several lines of investigation show that production of inflammatory  
670 mediators in the brain correlates strongly with CNS-mediated symptoms during  
671 cancer (Burfeind et al., 2018; Michaelis et al., 2017), yet the role of  
672 neuroinflammation during malignancies outside the CNS is still not well  
673 understood. Our data show that in a mouse model of PDAC, myeloid cells,  
674 consisting predominately of neutrophils, infiltrate the brain, in a CCR2-dependent  
675 manner, where they drive anorexia and muscle catabolism. We observed that  
676 infiltrating immune cells accumulated specifically in a unique layer of meninges  
677 called the velum interpositum (VI), which is adjacent to the hippocampus and the  
678 habenula, the latter of which is important for appetite regulation and is  
679 associating with cachexia in humans (Maldonado et al., 2018). We observed  
680 robust CCL2 mRNA and protein expression, along with CCR2+ neutrophils,  
681 exclusively in this region. The VI is implicated as a key structure for initial  
682 immune infiltration during states of neuroinflammation such as EAE (Schmitt et  
683 al., 2012) and traumatic brain injury (Szmydynger-Chodobska et al., 2016).  
684 Indeed, the VI contains the pial microvessels that are a key aspect of the  
685 “gateway reflex”, a neuro-immune pathway that involves interactions between  
686 leukocytes and neurons involved in stress response (Tanaka, Arima, Kamimura,  
687 & Murakami, 2017) and is implicated in gastrointestinal dysfunction during EAE  
688 (Arima et al., 2017). While we observed myeloid cell infiltration throughout the VI,  
689 we also observed accumulation of neutrophils and other leukocytes around the  
690 same pial vessels involved in the gateway reflex. The role of the gateway reflex

691 in feeding behavior has not been investigated. It is possible that, in our model of  
692 PDAC, brain infiltrating neutrophils were involved in generating anorexia and  
693 muscle catabolism via a neuro-immune circuit similar to the gateway reflex,  
694 involving inflammation generated in the VI, and possibly transmitted to the  
695 habenula, or other regions involved in appetite regulation.

696 The role and presence of infiltrating leukocytes in the CNS during  
697 systemic inflammation remain poorly understood. While previous reports show  
698 that neutrophils infiltrate the brain after septic doses of LPS or sepsis induced by  
699 cecal ligation (He et al., 2016), it is still unknown if they contribute to neurologic  
700 sequelae (anorexia, fatigue, cognition and memory deficits, etc.) during and after  
701 sepsis. A series of studies utilizing a mouse model of inflammatory liver disease  
702 showed that “sickness behaviors” could be attenuated if myeloid cell recruitment  
703 to the brain was abrogated via any one of several different interventions,  
704 including: 1) administration of a P-selectin inhibitor (Kerfoot et al., 2006), 2)  
705 deleting CCR2 (D'Mello et al., 2009), and 3) inhibiting microglia activation with  
706 minocycline (D'Mello et al., 2013). However, unlike our study, these studies did  
707 not address many CNS-mediated signs and symptoms associated with chronic  
708 disease, including anorexia and muscle catabolism, instead using social  
709 interaction as their sole measure of sickness behaviors. They also did not  
710 address whether their interventions affected monocyte infiltration in other tissues.  
711 In addition to systemic inflammatory diseases, Zenaro et al. showed that  
712 transient neutrophil depletion led to substantially improved amyloid beta burden,  
713 decreased neuroinflammation, and lessened cognitive decline in a mouse model

714 of Alzheimer's disease (Zenaro et al., 2015). Therefore, our results, along with  
715 previous studies, implicate brain-infiltrating myeloid cells as key players in driving  
716 CNS-mediated signs and symptoms during inflammatory disease.

717 We observed a decrease in total number of lymphocytes in the brain  
718 starting at 5 d.p.i., which persisted throughout the course of PDAC. This was  
719 driven by a decrease in B-cells and CD4+ T-cells. Since the vast majority of  
720 lymphocytes in the non-inflamed murine brain are intravascular, even after  
721 thorough perfusion of the vasculature (Mrdjen et al., 2018), we chose not to  
722 pursue lymphocytes in our subsequent analysis. However, these interesting  
723 results warrant investigation of the role of intravascular lymphocytes in the brain  
724 during conditions of inflammation. While several studies showed that  
725 intravascular neutrophils can induce pathology in the brain (Atangana et al.,  
726 2017; Ruhnau, Schulze, Dressel, & Vogelgesang, 2017), the function of  
727 intravascular T-cells, B-cells, and NK cells, which are presumably adherent to the  
728 endothelium, has yet to be investigated.

729 We performed the open field test and object recognition test to assess  
730 behavioral alterations and cognitive injury in KPC-derived tumor mice. We  
731 observed that tumor-bearing mice spent significantly less time in the center of the  
732 arena during the open field test, indicative of anxiety-like behavior. Our results  
733 are consistent with previous studies on animals inoculated with Lewis lung  
734 carcinoma cells, showing that tumor animals display anxiety-like behaviors  
735 (Campos et al., 2017; McGinnis et al., 2017). However, it is important to note that  
736 tumor animals moved significantly less than sham animals. Therefore, the severe

737 decrease in locomotor activity animals experienced may affect the ability to  
738 detect alterations in anxiety-like behavior and complicates extensive behavioral  
739 analysis in this model. The preferential exploring of the novel object in the object  
740 recognition test indicates that in contrast to activity, cognition was not impaired in  
741 this model.

742 We showed that CCR2KO mice exhibited significantly attenuated myeloid  
743 cell infiltration into the brain, as well as decreased anorexia and muscle  
744 catabolism, during PDAC. As discussed above, these results are in agreement  
745 with previous studies investigating sickness behaviors during inflammatory liver  
746 disease, which showed that CCR2KO mice exhibited attenuated monocyte  
747 infiltration into the brain, along with decreased sickness behaviors (D'Mello et al.,  
748 2009). Furthermore, it was recently reported that mice lacking CCR2 had  
749 decreased myeloid cell infiltration into the brain and attenuated cognitive  
750 impairment during a model of sepsis induced by *Streptococcus pneumoniae*  
751 injection into the lungs (Andonegui et al., 2018). In an attempt to identify  
752 inflammatory biomarkers for PDAC-associated cachexia, Talbert et al. identified  
753 CCL2 as the only cytokine or chemokine (out of a panel of 25) that was  
754 increased in the serum of cachectic PDAC patients but not increased in the  
755 serum of non-cachectic patients (Talbert et al., 2018). It is possible that the  
756 differences we observed in gastrocnemius catabolism between WT and  
757 CCR2KO tumor animals were due to differences in food intake, but the fact that  
758 we observed a significant decrease in induction of the catabolic genes *Mafbx*,

759 *Murf1*, and *Foxo1* in CCR2KO tumor animals, which are not induced by  
760 decreased food intake/starvation (T. P. Braun et al., 2011), makes this unlikely.

761 While CCR2 is usually not considered a key receptor for neutrophil  
762 recruitment, previous studies show it is important for neutrophil chemotaxis  
763 during sepsis (Souto et al., 2009; Souto et al., 2011). Interestingly, while we  
764 observed a robust decrease in brain-infiltrating neutrophils, we did not observe a  
765 decrease in liver- or tumor-infiltrating neutrophils in CCR2KO tumor mice,  
766 indicating that CCR2 is important for neutrophil recruitment specifically to the  
767 brain. Circulating neutrophils in sham animals did not express CCR2, but a small  
768 percentage of circulating neutrophils expressed CCR2 in tumor animals. There  
769 was no increase in CCR2-expressing neutrophils in the liver during PDAC.  
770 Alternatively, a significant percentage of neutrophils in the brain expressed CCR2  
771 during PDAC, meaning a distinct population of neutrophils is recruited to the  
772 brain from the circulation. In addition, there was actually a small increase in  
773 circulating neutrophils in CCR2KO tumor mice, ruling out the possibility that  
774 neutrophils were unable to extravasate out of the marrow. These results, along  
775 with our RNASeq data (discussed below), suggest that the population recruited  
776 to the brain has a distinct function from those recruited to other organs.

777 We administered oxidized ATP, a purinergic receptor antagonist, directly  
778 into the brain and observed complete abrogation of circulating myeloid cell  
779 recruitment to the brain in tumor animals, as well as anorexia attenuation. These  
780 results provide key mechanistic insights to show that brain inflammation is key for  
781 PDAC-associated anorexia. While there was no change in microglia morphology

782 after oATP administration, consistent with previous studies (Martin et al., 2018;  
783 Roth et al., 2014), we cannot rule out the possibility that the difference in  
784 anorexia we observed were due to changes in microglia phenotype. The  
785 presence of an indwelling lateral ventricle cannula may have also induced  
786 microglia activation and influenced morphology quantification. However, we did  
787 take care to acquire images from the contralateral hemisphere. Furthermore, we  
788 observed an increased Ly6C<sup>high</sup> monocyte infiltrate in our aCSF-treated tumor  
789 animals compared to non-cannulated tumor animals, suggesting the indwelling  
790 lateral ventricle cannula did affect the inflammatory response in the brain to at  
791 least a small degree. Nevertheless, oATP completely prevented myeloid cells  
792 from infiltrating the brain during PDAC, strongly implicating these cells as  
793 mediators of anorexia.

794 A few limitations should be considered when interpreting results of this  
795 study. First, our data were produced in a single model of pancreatic cancer.  
796 While our model is extensively characterized and reliably recapitulates many of  
797 the CNS-mediated symptoms observed in humans, other malignancies should  
798 also be considered. Second, it is possible, even likely, that circulating immune  
799 cells infiltrate and influence function in other organs dysfunctional during cancer  
800 (skeletal muscle, adipose tissue, etc.). However, the purpose of this study was to  
801 investigate and characterize interactions between circulating immune cells and  
802 the brain during PDAC. Therefore, we chose to focus specifically on the brain so  
803 as to not overcomplicate analysis. Third, we did observe a small increase in  
804 Ly6C<sup>hi</sup> monocytes in the brains of animals during PDAC, which was attenuated

805 by CCR2 deletion. We cannot rule out that these cells did not contribute to  
806 anorexia and muscle catabolism. However, there were far fewer Ly6C<sup>hi</sup>  
807 monocytes ( $\approx$ 2,000) in the brain than neutrophils ( $\approx$ 9,000) during PDAC, and  
808 these cells only constituted about 15% of brain CD45 high myeloid cells (vs.  
809 about 50% for neutrophils). Lastly, despite our extensive analysis, we cannot rule  
810 out with absolute certainty that the differences we observed in CCR2KO mice  
811 were not due to differences in tumor response. However, both the CCR2/CCL2  
812 axis and neutrophils are reported to be “pro-tumor” (Coffelt, Wellenstein, & de  
813 Visser, 2016; Qian et al., 2011) and therefore systemic treatment targeting  
814 neutrophils or the CCR2/CCL2 axis in humans may be particularly beneficial in  
815 that they decrease tumor size and abrogate CNS dysfunction. This would be  
816 advantageous to conventional anti-tumor therapies such as chemotherapy and  
817 checkpoint inhibitors, which are both known to cause cachexia-like symptoms  
818 (Theodore P. Braun et al., 2014; Michot et al., 2016) and not effective against  
819 PDAC (especially checkpoint inhibitors).

820 In summary, we demonstrated that myeloid cells infiltrate the CNS  
821 throughout the course of PDAC and that preventing myeloid cells from infiltrating  
822 the brain attenuates anorexia and muscle catabolism. We showed there are  
823 distinct mechanisms for immune cell recruitment to the brain during systemic  
824 inflammation, and demonstrate a novel role for CCR2 in neutrophil recruitment to  
825 the brain, providing key insights into mechanisms of neuroinflammation and  
826 associated symptoms.

827



828

829

830

831

832

833

834

## 835 **Materials and Methods**

836

### 837 **Animals**

838 Male and female 20–25g WT C57BL/6J (stock no. 000664), Ly5.1-EGFP (stock  
839 no. 00657), CCL2<sup>mCherry</sup> (stock no. 016849), and CCR2KO (stock no. 004999)  
840 were purchased at Jackson Laboratories. Animals were aged between 7 and 12  
841 weeks at the time of study and maintained at 27°C on a normal 12:12 hr  
842 light/dark cycle and provided *ad libitum* access to water and food. Experiments  
843 were conducted in accordance with the National Institutes of Health Guide for the  
844 Care and Use of Laboratory Animals, and approved by the Animal Care and Use  
845 Committee of Oregon Health & Science University.

846

### 847 **KPC Cancer Model**

848 Our lab generated a mouse model of PDAC by a single IP injection of murine-  
849 derived KPC PDAC cells (originally provided by Dr. Elizabeth Jaffee from Johns  
850 Hopkins) (Michaelis et al., 2017). These cells are derived from tumors in  
851 C57BL/6 mice heterozygous for oncogenic KRAS<sup>G12D</sup> and point mutant

852 TP53<sup>R172H</sup> with expression targeted to the pancreas via the PDX-1-Cre driver  
853 (Foley et al., 2015). Cells were maintained in RPMI supplemented with 10%  
854 heat-inactivated FBS, and 50 U/mL penicillin/streptomycin (Gibco, Thermofisher),  
855 in incubators maintained at 37°C and 5% CO<sub>2</sub>. In the week prior to tumor  
856 implantation, animals were transitioned to individual housing to acclimate to  
857 experimental conditions. Animal food intake and body weight were measured  
858 once daily. Sham-operated animals received PBS in the same volume. Bedding  
859 was sifted daily to account for food spillage not captured by cagetop food intake  
860 measurement. Animals were euthanized between 8 and 11 days post inoculation,  
861 when food intake was consistently decreased and locomotor activity was visibly  
862 reduced, yet signs of end-stage disease (ascites, unkempt fur, hypothermia,  
863 etc.) were not present (Michaelis et al., 2017).

864

#### 865 **Generation of Ly5.1-EGFP Chimera Mice**

866 WT C57BL/6J male mice aged 8-10 weeks were injected IP with the alkylating  
867 agent treosulfan (Ovastat<sup>®</sup>, a generous gift from Joachim Baumgart at Medac  
868 GmbH, Germany) at a dose of 1500 mg/kg/day for 3 consecutive days prior to  
869 the day of bone marrow transplant (BMT). 24 hrs after the third treosulfan  
870 injection, a Ly5.1-EGFP male or female donor mouse aged between 2-6 months  
871 was euthanized and femurs, tibiae, humeri, and radii were dissected. After  
872 muscle and connective tissue were removed, marrow cells were harvested by  
873 flushing the marrow cavity of dissected bones using a 25-gauge needle with  
874 Iscove's modified Dulbecco's medium supplemented with 10% FBS. The

875 harvested cells were treated with RBC lysis buffer, filtered with a 70  $\mu$ m cell  
876 strainer, and counted.  $3-4 \times 10^6$  cells in 200  $\mu$ L HBSS were transplanted  
877 immediately into each recipient mouse via tail vein injection. To prevent infection  
878 during an immunocompromised period, recipient mice received amoxicillin  
879 dissolved in their drinking water (150 mg/L) for 2 weeks starting on the first day of  
880 treosulfan injection. GFP BMT mice were given at least 5 weeks for marrow  
881 reconstitution and recovery. Percent chimerism in each GFP BMT mouse was  
882 determined by flow cytometry analysis of circulating leukocytes.

883

#### 884 **Behavioral Analysis**

885 Behavioral and cognitive tests were performed on days 7-9 d.p.i. The open field  
886 test was conducted on days 7 and 8 post-inoculation, and the object recognition  
887 test was performed on days 8 and 9 post-inoculation. For all behavioral analyses,  
888 observers were blinded to group (tumor vs. sham).

889

890 *Open field Testing.* Exploratory and anxiety-like behaviors were assessed using  
891 the open field test on two subsequent days. The open field consisted of a brightly  
892 lit square arena (L 40.6  $\times$  W 40.6  $\times$  H 40.6 cm). The light intensity in the center of  
893 the open field was 100 lux. Mice were allowed to explore for 10 min in each trial.  
894 Behavioral performance was tracked and analyzed using an automated video  
895 system (Ethovision 7.0 XT, Noldus). Exploratory behavior was analyzed and  
896 included total distance moved and time spent in the center (20  $\times$  20 cm) of the  
897 open field.

898

899 *Novel Object Recognition.* Mice were habituated to the open field arena over two  
900 days as described above on two subsequent days. On the third day, mice were  
901 exposed to the arena containing two identical objects (small orange hexagonal  
902 prisms) placed 15 cm from the adjacent walls and 10 cm apart for 15 min. On  
903 day four, one of the identical objects (“familiar”) was replaced with a novel object  
904 (small green triangular prism) of similar dimensions and mice were again allowed  
905 to explore for 15 min. During both the open field and novel object recognition  
906 tests, mice were placed into the center of the arena. Clear visuospatial  
907 orientation to the object, within 2 cm proximity, as well as physical interaction  
908 with the object was coded as exploratory behavior, and the percent time spent  
909 exploring the novel versus the familiar object was calculated. Three tumor  
910 animals were excluded from analysis because of complete lack of exploratory  
911 behavior.

912

### 913 **Intracerebroventricular Cannulation and Injections**

914 Mice were anesthetized under isoflurane and placed on a stereotactic alignment  
915 instrument (Kopf Instruments). 26-gauge lateral ventricle cannulas were placed  
916 at 1.0 mm X, -0.5 mm Y, and -2.25 mm Z relative to bregma. Mice were given  
917 one week for recovery after cannula placement. Injections were given in 2  $\mu$ l total  
918 volume. Oxidized ATP was dissolved in aCSF and injected at a concentration of  
919 250 ng/ $\mu$ L over 5 min while mice were anesthetized under isoflurane.

920

## 921 **Immunofluorescence Immunohistochemistry**

922 Mice were anesthetized using a ketamine/xylazine/acetapromide cocktail and  
923 sacrificed by transcardial perfusion fixation with 15 mL ice cold 0.01 M PBS  
924 followed by 25 mL 4% paraformaldehyde (PFA) in 0.01 M PBS. Brains were  
925 post-fixed in 4% PFA overnight at 4°C and cryoprotected in 20% sucrose for 24  
926 hrs at 4°C before being stored at -80°C until used for immunohistochemistry.  
927 Immunofluorescence immunohistochemistry was performed as described below.  
928 Free-floating sections were cut at 30 µm from perfused brains using a Leica  
929 sliding microtome. Sections were incubated for 30 min at room temperature in  
930 blocking reagent (5% normal donkey serum in 0.01 M PBS and 0.3% Triton X-  
931 100). After the initial blocking step, sections were incubated in primary antibody  
932 (listed below) in blocking reagent for 24 hrs at 4°C, followed by incubation in  
933 secondary antibody (also listed below) for 2 hrs at room temperature. Between  
934 each stage, sections were washed thoroughly with 0.01 M PBS. Sections were  
935 mounted onto gelatin-coated slides and coverslipped using Prolong Gold antifade  
936 media with DAPI (Thermofisher).

937       The following primary anti-mouse antibodies were used, with company,  
938 clone, host species, and concentration indicated in parentheses: CD11b  
939 (eBioscience, rat, M1/70, 1:1000), CD45 (BD, rat, 30-F11, 1:1000),  
940 myeloperoxidase (R&D, goat, polyclonal, 1:1000), Ly6G (Biolegend, 1A8, rat,  
941 1:250), Iba-1 (Wako, Rabbit, NCNP24, 1:1000), CD206 (Bio-rad, rat, MR5D3,  
942 1:1000), ER-TR7 (Abcam, rat, ER-TR7, 1:1000), and citrillunated histone H3  
943 (Abcam, rat, polyclonal, 1:1000). We also used a chicken anti-mCherry antibody

944 (Novus Biologicals, polyclonal, 1:20,000), to amplify mCherry signal in sections  
945 from CCL2<sup>fl/fl</sup> mice and a rabbit anti-RFP antibody (Abcam, polyclonal, 1:1000) to  
946 amplify RFP signal in sections from CCR2<sup>RFP/WT</sup> mice.

947 The following secondary antibodies were used, all derived from donkey  
948 and purchased from Invitrogen, with dilution in parentheses: anti-goat AF488  
949 (1:500), anti-rabbit AF555 (1:1000), anti-rat AF555 (1:1000), anti-rat AF633  
950 (1:500), and anti-chicken AF555 (1:1000).

951

### 952 **Image acquisition and analysis**

953 All images were acquired using a Nikon confocal microscope. Cell quantification  
954 was performed on 20X images using the Fiji Cell Counter plugin by a blinded  
955 researcher. CD45+ cells were defined as CD45 bright globoid cells, and  
956 neutrophils were defined as CD45+ MPO+ cells. The velum interpositum (VI) was  
957 defined as the layer of meninges (identified by appearance of staining  
958 background) between the hippocampus and thalamus, from bregma -1.7 to -2.6  
959 mm. At least 8 VI images were quantified from each animal. The median  
960 eminence was defined as the base of the mediobasal hypothalamus (far ventral  
961 part of the brain), adjacent to the third ventricle from bregma -1.95 to -2.5 mm.  
962 Four ME images were quantified from each animal. The area postrema was  
963 defined as the region in from bregma -7.2 to -7.75 mm. Four area postrema  
964 images were quantified from each animal.

965

### 966 **Microglia morphology analysis**

967 Microglia activation in the hippocampus was quantified using Fiji (ImageJ,  
968 NIH). Five images of the dentate gyrus were acquired from each animal. Images  
969 were 2048 x 2048 pixels, with a pixel size of 0.315  $\mu\text{m}$ . Images were uploaded to  
970 Fiji by a blinded reviewer (KGB) and converted to 8-bit greyscale images. After  
971 thresholding, microglia were identified using the “analyze particle” function, which  
972 measured mean Iba-1 fluorescent intensity per cell, cell area, and percent area  
973 covered by Iba-1 staining.

974

### 975 ***In situ* hybridization**

976 At 10 d.p.i., mice were euthanized with  $\text{CO}_2$  and brains were removed then  
977 frozen on dry ice. 20  $\mu\text{m}$  coronal sections were cut on a cryostat and thaw-  
978 mounted onto Superfrost Plus slides (VWR Scientific). Sections were collected in  
979 a 1:6 series from the diagonal band of Broca (bregma 0.50 mm) caudally through  
980 the mammillary bodies (bregma 5.00 mm). 0.15  $\mu\text{mol/ml}$  of an antisense  $^{33}\text{P}$ -  
981 labeled mouse *Ccl2* riboprobe (corresponding to bases 38-447 of mouse *Ccl2*;  
982 GenBank accession no. NM\_011333.3) was denatured, dissolved in hybridization  
983 buffer along with 1.7 mg/ ml tRNA, and applied to slides. Slides were covered  
984 with glass coverslips, placed in a humid chamber, and incubated overnight at  
985 55°C. The following day, slides were treated with RNase A and washed under  
986 conditions of increasing stringency. Slides were dipped in 100% ethanol, air  
987 dried, and then dipped in NTB-2 liquid emulsion (Kodak). Slides were developed  
988 4 d later and cover slipped.

989



## 990 **Quantitative Real-Time PCR**

991 Prior to tissue extraction, mice were euthanized with a lethal dose of a  
992 ketamine/xylazine/acetapromide and sacrificed. Hippocampal blocks and  
993 gastrocnemii were dissected, snap frozen, and stored in  $-80^{\circ}\text{C}$  until analysis.  
994 RNA was extracted using an RNeasy mini kit (Qiagen) according to the  
995 manufacturer's instructions. cDNA was transcribed using TaqMan reverse  
996 transcription reagents and random hexamers according to the manufacturer's  
997 instructions. PCR reactions were run on an ABI 7300 (Applied Biosystems),  
998 using TaqMan universal PCR master mix with the following TaqMan mouse gene  
999 expression assays: *18s* (Mm04277571\_s1), *Ccl2* (Mm99999056\_m1), *Ccl3*  
1000 (Mm00441259\_g1), *Ccl5* (Mm01302427\_m1), *Cxcl1* (Mm04207460\_m1), *Cxcl2*  
1001 (Mm00436450\_m1), *Cxcl5* (Mm00436451\_g1), *Cxcl9* (Mm00434946\_m1),  
1002 *Cxcl10* (Mm00445235\_m1), *Gapdh* (Mm99999915\_g1),  
1003 *Mafbx* (Mm00499518\_m1), *Murf1* (Mm01185221\_m1), and  
1004 *Foxo1* (Mm00490672\_m1).

1005 Relative expression was calculated using the  $\Delta\Delta\text{Ct}$  method and  
1006 normalized to WT vehicle treated or sham control. Statistical analysis was  
1007 performed on the normally distributed  $\Delta\text{Ct}$  values.

1008

## 1009 **Flow cytometry**

1010 Mice were anesthetized using a ketamine/xylazine/acetapromide cocktail and  
1011 perfused with 15 mL ice cold 0.01 M PBS to remove circulating leukocytes. If  
1012 circulating leukocytes were analyzed, blood was drawn prior to perfusion via

1013 cardiac puncture using a 25-gauge needle, then placed in an EDTA coated tube.

1014 After perfusion, organs were extracted and immune cells were isolated using the

1015 following protocols:

1016

1017 *Brain.* Brains were minced in a digestion solution containing 1 mg/mL type II

1018 collagenase (Sigma) and 1% DNase (Sigma) in RPMI, then placed in a 37°C

1019 incubator for 45 min. After digestion, myelin was removed via using 30% percoll

1020 in RPMI. Isolated cells were washed with RPMI, incubated in Fc block for 5 min,

1021 then incubated in 100 µL of PBS containing antibodies for 30 min at 4°C. Cells

1022 were then washed once with RPMI.

1023

1024 *Liver.* Livers were pushed through a 70 µm nylon strainer, then washed once with

1025 RPMI. The resulting suspension was resuspended in a 40 mL digestion solution

1026 containing 1 mg/mL type II collagenase (Sigma) and 1% DNase (Sigma) in

1027 RPMI, then placed in a 37°C incubator for 1 hr. After digestion, the suspension

1028 was placed on ice for 5 min, then the top 35 mL was discarded. The remaining 5

1029 mL was washed in RPMI, resuspended in 10 mL 35% percoll to remove debris,

1030 then treated with RBC lysis buffer. The resulting cell suspension was washed

1031 with RPMI, then cells were incubated in 100 µL of PBS containing antibodies for

1032 30 min, then washed with RPMI.

1033

1034 *Tumor.* A 0.4-0.5 g piece of pancreatic tumor was removed, minced in a

1035 digestion solution containing 1 mg/mL type II collagenase (Sigma) and 1%

1036 DNase (Sigma) in RPMI, then placed in a 37°C incubator for 1 hr. After digestion,  
1037 cells were washed with RPMI, then incubated in 100 µL of PBS containing  
1038 antibodies for 30 min at 4°C. Cells were then washed once with RPMI.

1039

1040 *Blood.* 200 µL of blood was drawn via cardiac puncture with a 25-gauge needle.  
1041 Red blood cells were then lysed with 1X RBC lysis buffer. The resulting cell  
1042 suspension was washed with RPMI, then cells were incubated in 100 µL of PBS  
1043 containing antibodies for 30 min at 4°C, then washed with RPMI.

1044

1045 *Gating Strategy.* Cells were gated on LD, SSC singlet, and FSC singlet. Immune  
1046 cells were defined as CD45<sup>+</sup> cells. In the brain, microglia were defined as  
1047 CD45<sup>mid</sup>CD11b<sup>+</sup>. Leukocytes were identified as either myeloid cells  
1048 (CD45<sup>high</sup>CD11b<sup>+</sup> in the brain, CD45<sup>+</sup>CD11b<sup>+</sup> in all other tissues) or  
1049 lymphocytes (CD45<sup>high</sup>CD11b<sup>-</sup> in the brain, CD45<sup>+</sup>CD11b<sup>-</sup> in all other tissues).  
1050 From myeloid cells Ly6C<sup>low</sup> monocytes (Ly6C<sup>low</sup>Ly6G<sup>-</sup>), Ly6C<sup>high</sup> monocytes  
1051 (Ly6C<sup>high</sup>Ly6G<sup>-</sup>), and neutrophils (Ly6C<sup>mid</sup>Ly6G<sup>+</sup>) were identified. From  
1052 lymphocytes, CD3<sup>+</sup> cells were identified as T-cells, and further phenotyped as  
1053 CD4<sup>+</sup> or CD8<sup>+</sup> T-cells. CD3<sup>-</sup> T-cells were divided into NK1.1<sup>+</sup> NK cells or CD19<sup>+</sup>  
1054 B-cells. Flow cytometry analysis was performed on a BD Fortessa or LSRII  
1055 analytic flow cytometer.

1056

1057 *Antibodies.* All antibodies were purchased from BioLegend, except for Live/Dead,  
1058 which was purchased from Invitrogen (Fixable Aqua, used at 1:200 dilution). The

1059 following anti-mouse antibodies were used, with clone, fluorophore, and dilution  
1060 indicated in parenthesis: CD3 (17A2, PE, 1:100), CD3 (17A2, APC/Cy7, 1:400),  
1061 CD4 (RM4-5, APC, 1:100), CD8 (53-6.7, APC/Cy7, 1:800), CD11b (M1/70, APC,  
1062 1:800), CD11b (M1/70, FITC, 1:200), CD19 (6D5,BV650, 1:33), CD45 (30-F11,  
1063 PerCP/Cy5.5, 1:400), CD45 (30-F11, APC/Cy7, 1:400), Ly6C (HK1.4, PerCP,  
1064 1:100), Ly6G (1A8, PE/Cy7, 1:800), NK1.1 (PK136, BV785, 1:800), CCR2  
1065 (SA203G11, AF647, 1:100).

1066

1067 *FACS sorting for RNAseq.* At 10 d.p.i., mice were anesthetized and 200  $\mu$ L of  
1068 blood was drawn via cardiac puncture with a 25-gauge needle. Circulating  
1069 leukocytes were then removed via transcardiac perfusion with PBS and brain,  
1070 liver, and tumor were removed. Leukocytes were isolated from blood, brain, liver,  
1071 and tumor as described above. Sorting was performed using an Influx sorter (BD)  
1072 with a 100  $\mu$ m nozzle. Neutrophils were defined as CD11b<sup>high</sup>Ly6G<sup>high</sup> live, singlet  
1073 cells, and were sorted into lysis buffer (Qiagen), then stored at -80° C.

1074

## 1075 **RNA Isolation and Sequencing**

1076 *RNA Isolation, sequencing, and library preparation.* Total RNA was isolated from  
1077 FACS-sorted CD11b<sup>high</sup>Ly6G<sup>high</sup> neutrophils using an RNeasy Plus Micro kit  
1078 (Qiagen). RNA integrity was verified by a Bioanalyzer (Agilent). Sample cDNAs  
1079 were prepared using the SMART-Seq v4 Ultra Low Input kit (Takara) using 250  
1080 pg of input total RNA followed by library preparation using a TruSeq DNA Nano  
1081 kit (Illumina). Libraries were verified by TapeStation (Agilent). Library

1082 concentrations were determined by real-time PCR with a StepOnePlus Real  
1083 Time PCR System (Thermo Fisher) and a Kapa Library Quantification Kit (Kapa  
1084 Biosystems / Roche). Libraries were sequenced with a 100 cycle single read  
1085 protocol on a HiSeq 2500 (Illumina) with four libraries per lane. Fastq files were  
1086 assembled using Bcl2Fastq2 (Illumina).

1087

1088 *RNA-seq processing and analysis.* Quality control checks were done using the  
1089 FastQC package (<https://www.bioinformatics.babraham.ac.uk/projects/fastqc/>).  
1090 Raw reads were normalized and analyzed using the Bioconductor package  
1091 DESeq2 (Love, Huber, & Anders, 2014), which uses negative binomial  
1092 generalized linear models. Only those genes that were expressed in at least one  
1093 sample were included in differential expression analysis. To identify transcripts  
1094 differentially expressed in brain-infiltrating neutrophils compared to neutrophils  
1095 infiltrating other organs, gene expression in neutrophils isolated from brain was  
1096 compared to that in neutrophils isolated from liver, tumor, and blood. In order to  
1097 control for the effects of tumor on circulating neutrophils, genes that also were  
1098 differentially expressed in circulating neutrophils from tumor mice compared to  
1099 circulating neutrophils from sham mice were excluded from analysis. All p-values  
1100 were adjusted for multiple comparisons using the Benjamini-Hochberg method  
1101 (Benjamini & Hochberg, 1995). Differential expression was defined based on  
1102 statistical significance (adjusted p-value < 0.05) and effect size ( $\log_2$  fold change)  
1103  $\leq$  or  $\geq$  -2. Heatmaps were created using the pheatmap package from R. Gene  
1104 Ontology analysis was performed using the Goseq Bioconductor R

1105 package(Young, Wakefield, Smyth, & Oshlack, 2010). For pathway enrichment  
1106 analysis, pathway annotation from the Reactome knowledgebase (Croft et al.,  
1107 2014; Fabregat et al., 2018) was used.

1108

### 1109 **Statistical Analysis**

1110 Data are expressed as means  $\pm$  SEM. Statistical analysis was performed with  
1111 Prism 7.0 software (Graphpad Software Corp). When two groups were  
1112 compared, data were analyzed with either student's t-test or Mann-Whitney U  
1113 test. When more than two groups were compared, data were analyzed with either  
1114 One-way (when multiple groups were compared to a single sham group) or Two-  
1115 way (when there were multiple genotypes within tumor and sham groups being  
1116 compared) ANOVA analysis. For single time point experiments, the two factors in  
1117 ANOVA analysis were genotype or treatment. In repeated measures  
1118 experiments, the two factors were group and time. Main effects of genotype,  
1119 treatment, group, and/or time were first analyzed, and if one effect was  
1120 significant, Bonferroni *post hoc* analysis was then performed. For all analyses,  
1121 significance was assigned at the level of  $p < 0.05$ .

1122

1123

1124

1125

1126

1127

1128

1129

1130

1131

1132

1133

1134

1135

1136

1137

1138 **Supplementary Materials**



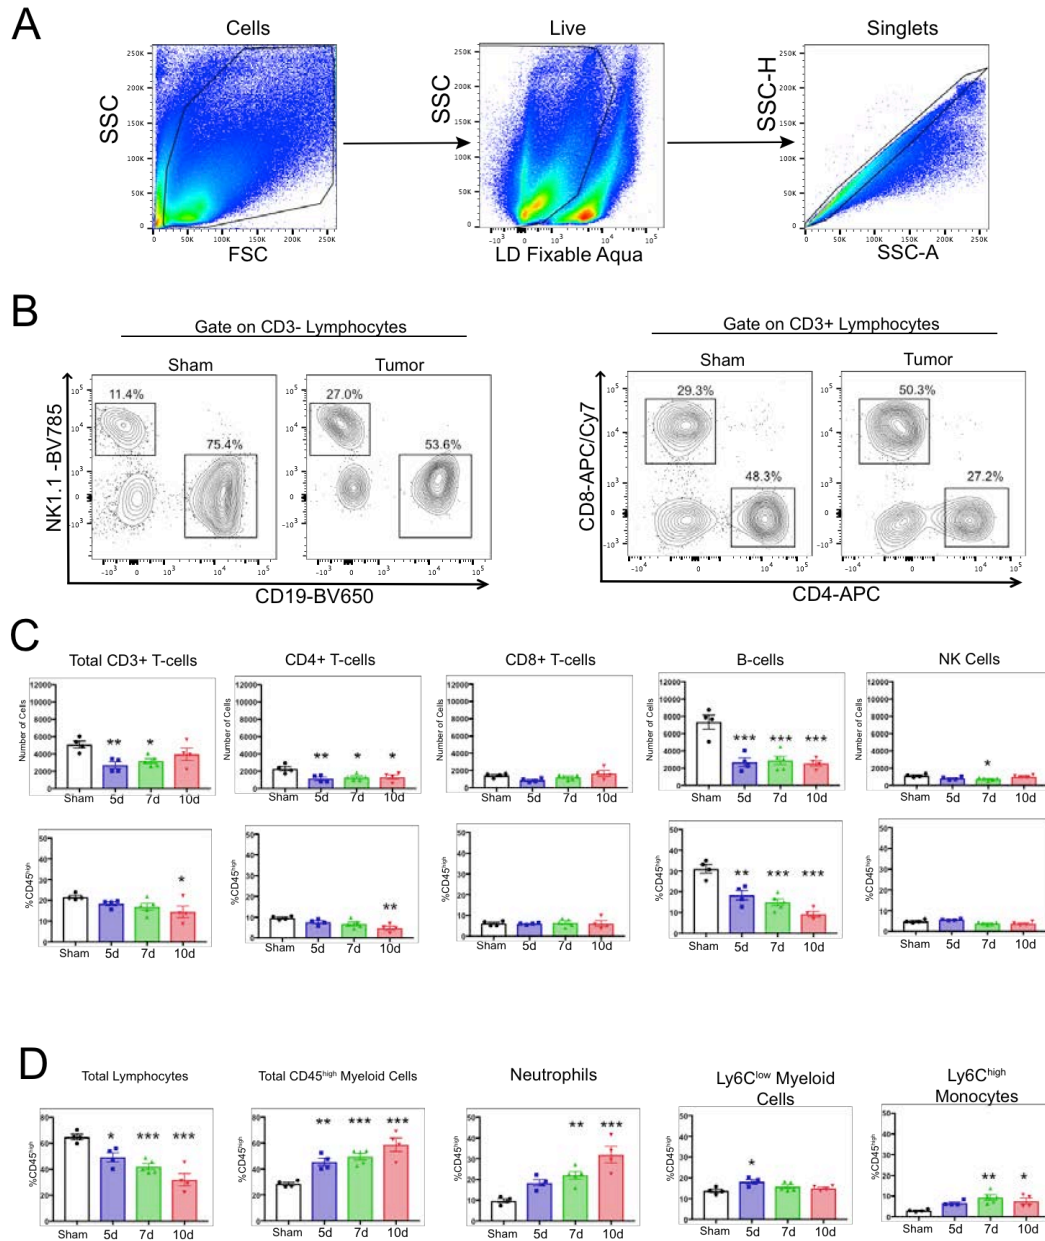

1139

1140 **Figure S1. Decreased lymphocytes in the brain during PDAC.** A) Gating  
 1141 strategy to identify live single cells from whole brain homogenate. B)  
 1142 Representative plots of different lymphocyte populations from brain homogenate  
 1143 from sham and tumor (10 d.p.i.) animals. For CD3<sup>-</sup> cells, NK cells =  
 1144 NK1.1+CD19<sup>-</sup>, B-cells = CD19<sup>+</sup>NK1.1<sup>-</sup>. For CD3<sup>+</sup> cells, CD4<sup>+</sup> and CD8<sup>+</sup> T-cells

1145 were identified. C) Quantification of different lymphocyte populations throughout  
1146 PDAC. \* $P < 0.05$ , \*\* $P < 0.01$ , \*\*\* $P < 0.001$  compared to sham one-way ANOVA  
1147 Bonferroni *post hoc* analysis. D) Quantification of different immune cell  
1148 populations in the brain, as a percentage of CD45<sup>high</sup> cells. \* $P < 0.05$ , \*\* $P < 0.01$ ,  
1149 \*\*\* $P < 0.001$  compared to sham.  $n = 4-5$ /group. Results are representative of  
1150 three independent experiments.  
1151

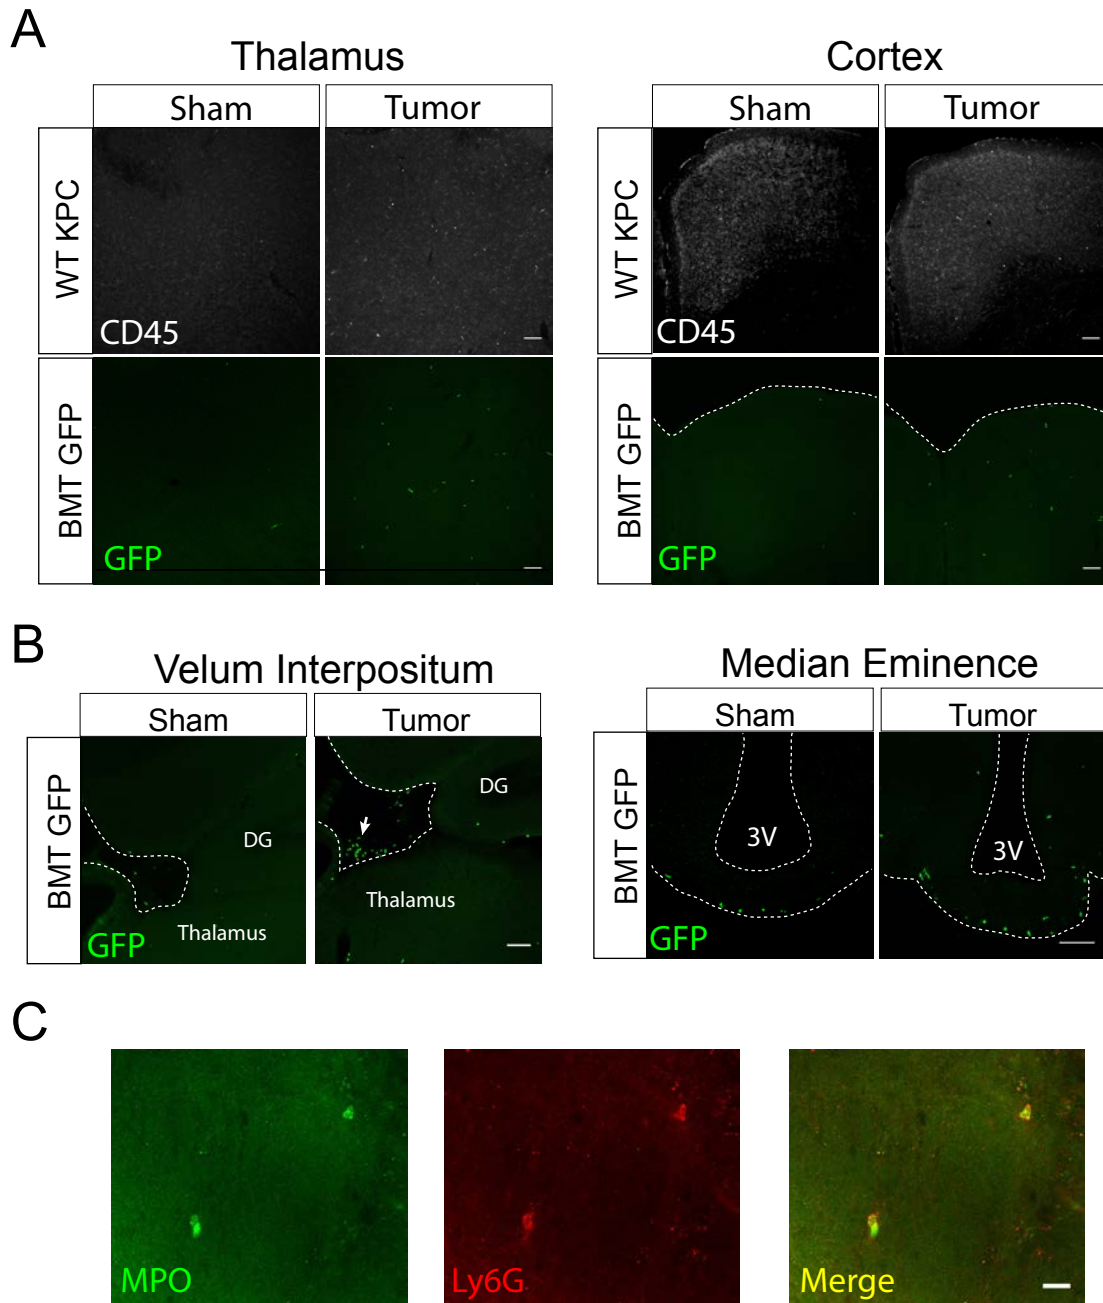

1152

1153 **Figure S2. Immunofluorescence analysis of infiltrating immune cells during**

1154 **PDAC** A) 10X confocal images of thalamus and cortex from sham and tumor

1155 mouse brains, 10 d.p.i. WT KPC = WT animals, BMT GFP = Ly5.1 eGFP marrow

1156 transplanted into WT recipient after treosulfan conditioning to ablate marrow (see

1157 Methods). Scale bar = 100  $\mu$ m. B) 10X (VI) and 20X (ME) confocal images of VI

1158 and ME from sham and tumor (10 d.p.i.) mice. In images of the VI, dashed line  
1159 denotes edge of parenchyma and beginning of meninges. Arrow = cluster of  
1160 infiltrating GFP+ immune cells in the VI meninges. DG = dentate gyrus. 3V = third  
1161 ventricle. Scale bars = 100  $\mu$ m. C) 40X confocal image of thalamus from tumor  
1162 mouse, 12 d.p.i. Scale bar = 20  $\mu$ m.

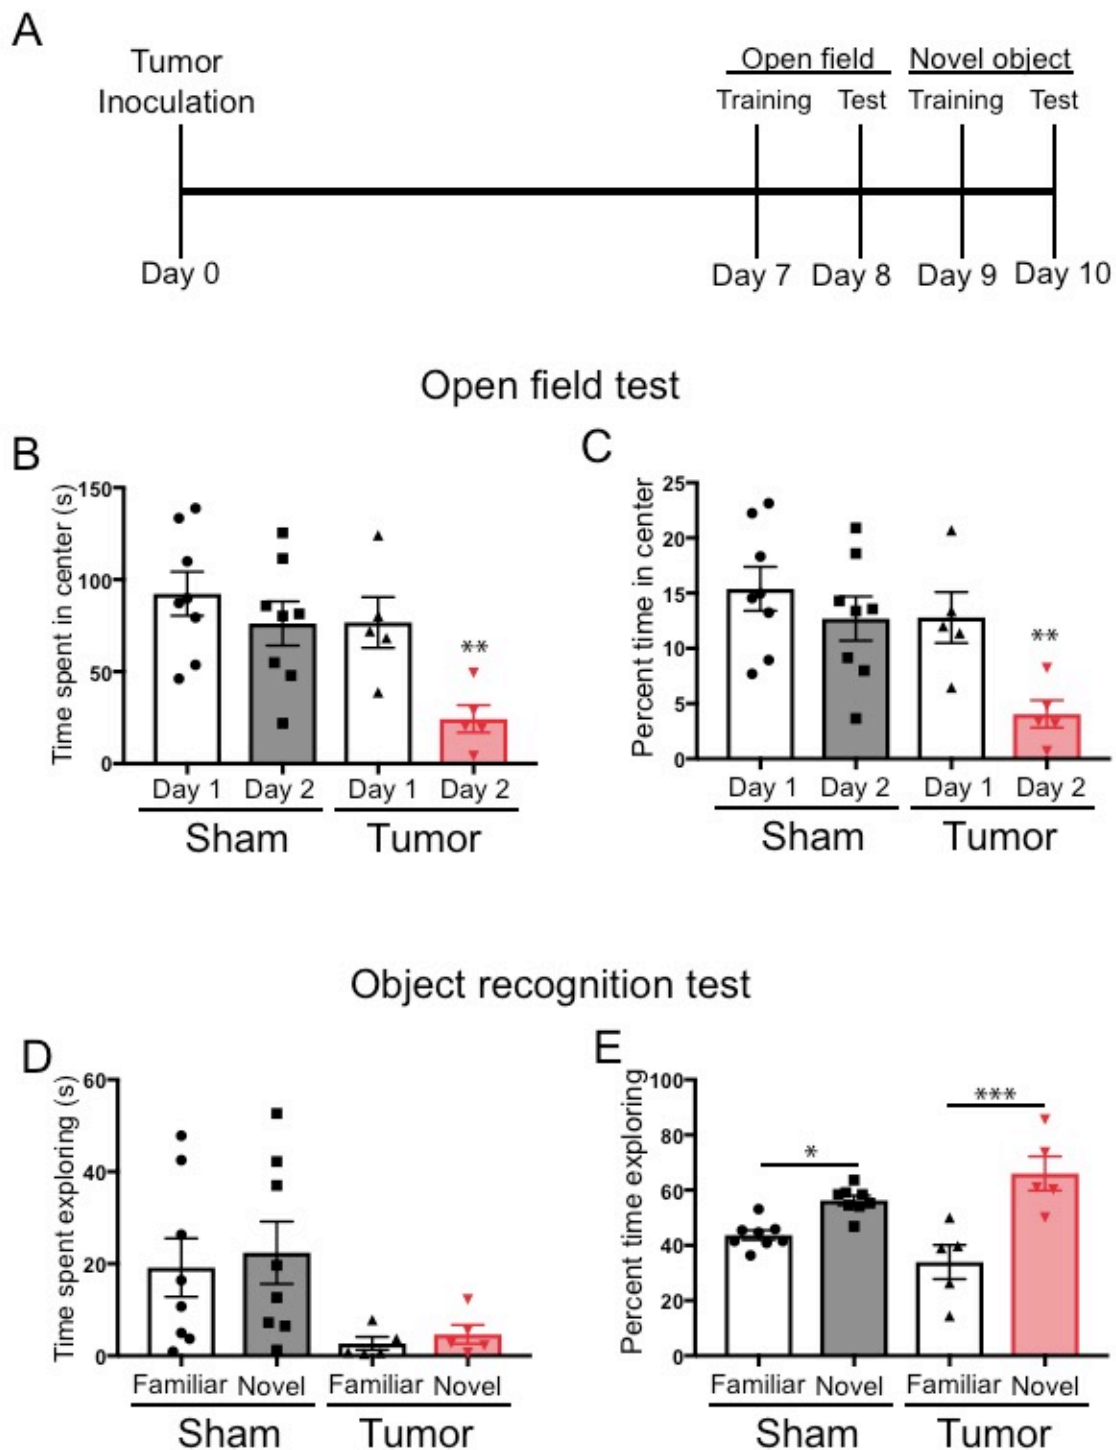

1163  
1164

**Figure S3: Cognitive performance of KPC tumor mice.** A) Illustration

1165 depicting timeline of behavioral tests. B) Total time spent in center of arena

1166 during open field test on the first and second day of testing. C) Percent of total

1167 time that was spent in the center of the arena during the first and second day of  
1168 the open field test. For B and D,  $**P < 0.01$ , student's t-test comparing sham day  
1169 2 to tumor day 2. D) Total time spent investigating the familiar or the novel object.  
1170 E) Percent of total time spent exploring the familiar object and the novel object.  
1171  $*P < 0.05$ ,  $***P < 0.001$ , Bonferroni post-hoc analysis in two-way ANOVA. For all  
1172 panels,  $n = 8$  sham mice and  $n = 5$  tumor mice. Three tumor animals were  
1173 excluded from all analyses due to complete lack of movement. Data are  
1174 presented as mean  $\pm$  s.e.m.

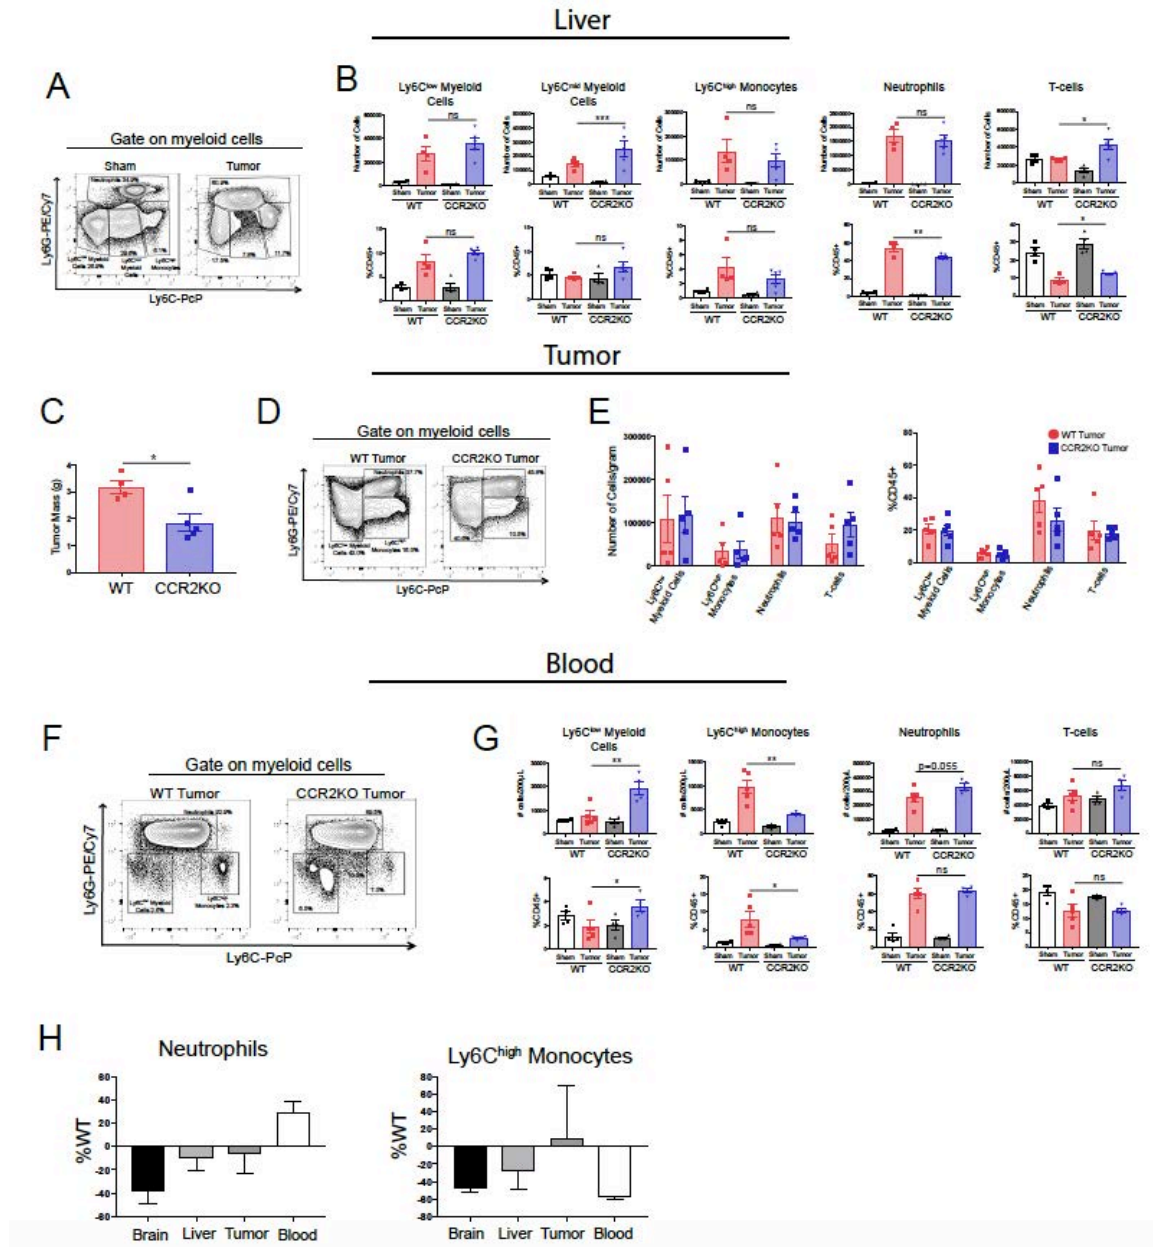

1175

1176 **Figure S4. The CCR2-CCL2 axis is of selective importance for the brain**

1177 **during PDAC.** A) Representative flow cytometry plot of different myeloid cell

1178 populations from WT sham and tumor livers, 11 d.p.i., in order to illustrate

1179 different myeloid cell populations identified based on Ly6C and Ly6G expression.

1180 Cells are gated on live, singlet CD45<sup>+</sup>CD11b<sup>+</sup> cells. B) Quantification of flow

1181 cytometry analysis of different immune cell populations in the liver from WT and



1182 CCR2KO sham and tumor animals, 11 d.p.i. \* $P < 0.05$ , \*\* $P < 0.01$ , WT tumor vs.  
1183 CCR2KO tumor, or tumor vs. sham in the same genotype in Bonferroni *post hoc*  
1184 analysis in two-way ANOVA. ns = not significant.  $n = 4-9$ /group. C) Tumor mass  
1185 from WT and CCR2KO animals, 11 d.p.i. Data are representative of three  
1186 independent experiments. Data are presented as mean  $\pm$  s.e.m. D)  
1187 Representative flow cytometry plot of different myeloid cell populations from WT  
1188 and CCR2KO tumors, 10 d.p.i. Cells are gated on live, singlet CD45+CD11b+  
1189 cells. E) Quantification of flow cytometry analysis of different immune cell  
1190 populations isolated from tumor from WT and CCR2KO tumor animals, 10 d.p.i.  
1191 Data consist of two independent experiments pooled ( $n =$  at least 2 per group per  
1192 experiment). Data are presented as mean  $\pm$  s.e.m. F) Representative plot of  
1193 different myeloid cell populations from WT and CCR2KO tumor animal blood, 10  
1194 d.p.i. Cells are gated on live, singlet CD45+CD11b+ cells. G) Quantification of  
1195 flow cytometry analysis of different immune cell populations in the blood from WT  
1196 and CCR2KO sham and tumor animals, 10 d.p.i. \* $P < 0.05$ , \*\* $P < 0.01$ , WT tumor  
1197 vs. CCR2KO tumor, or tumor vs. sham in the same genotype in Bonferroni *post*  
1198 *hoc* analysis in two-way ANOVA. ns = not significant.  $n = 4-5$ /group. Data are  
1199 representative of two independent experiments. H) Analysis of neutrophils and  
1200 Ly6C<sup>high</sup> monocytes in brain, liver, tumor, and blood in CCR2KO tumor mice,  
1201 normalized to number in WT tumor mice.  $n = 5-9$ /group.



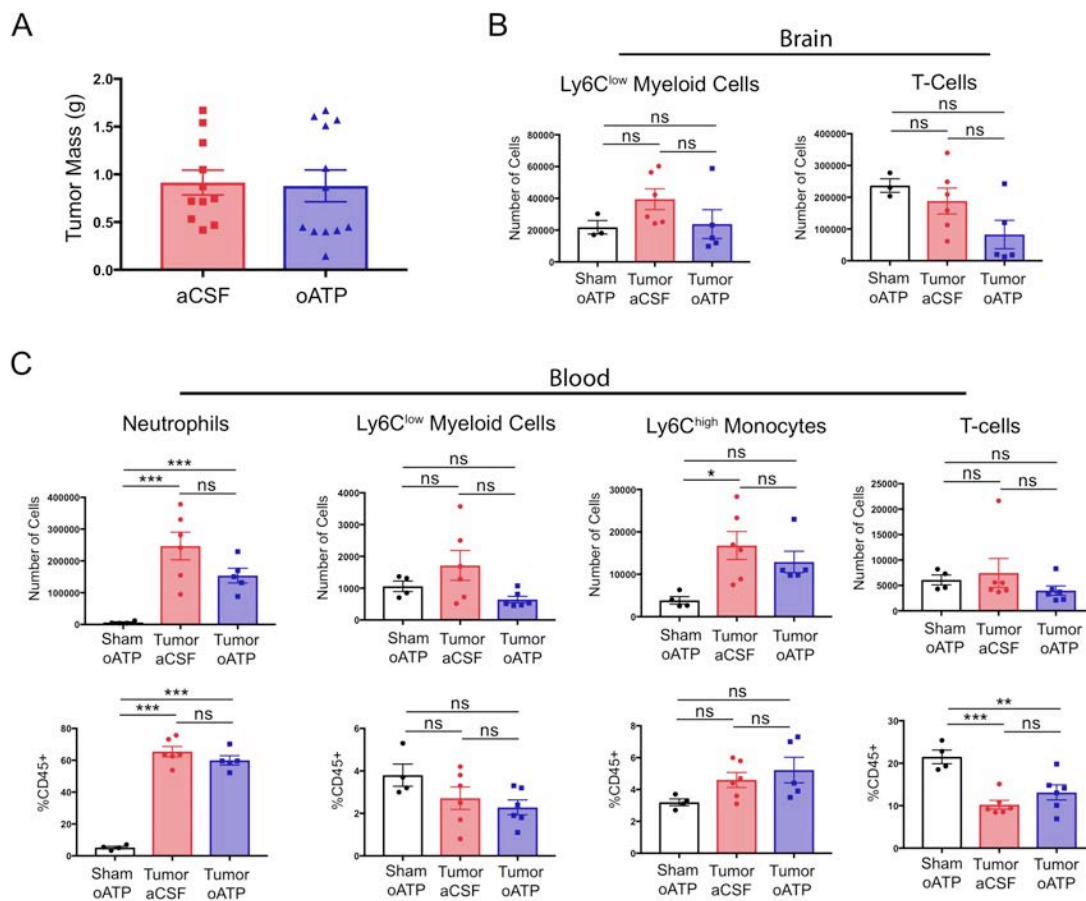

1202

1203 **Figure S5. Intracerebroventricular antagonism of P2RX7 does not affect**

1204 **systemic inflammation or tumor size during PDAC.** A) Tumor mass from

1205 aCSF- and oATP-treated tumor-bearing mice, 8-10 d.p.i.  $n = 11-12$ /group.

1206 Results consist of two independent experiments pooled ( $n = 5-7$ /group in each

1207 experiment). B) Quantification of immune cells isolated from whole brain

1208 homogenate. ns = not significant in Bonferroni *post hoc* analysis in two-way

1209 ANOVA.  $n = 4-7$ /group. C) Quantification of immune cells isolated from blood, per

1210 200  $\mu$ L of blood. \* $P < 0.05$ , \*\* $P < 0.01$ , \*\*\* $P < 0.001$  in Bonferroni *post hoc*

1211 analysis in two-way ANOVA. ns = not significant.  $n = 4-6$ /group.

1212

1213

1214

1215

1216

1217

1218

1219

1220 **Acknowledgements**

1221 We would like to thank Pamela Canaday, Dorian LaTocha, and Sara Christensen  
1222 at the OHSU Flow Cytometry Core for their assistance with FACS sorting for  
1223 RNASeq; Taylor McFarland at the OHSU Gene Profiling Shared Resource for his  
1224 assistance with RNA isolation; Amy Carlos and Dr. Robert Searles at the OHSU  
1225 Massively Parallel Sequencing Core for their assistance with RNA sequencing  
1226 and library preparation; Matthew Michaelis for assistance with the graphical  
1227 abstract; Dr. Elizabeth Jaffee from Johns Hopkins for providing KPC tumor cells;  
1228 Drs. Joachim Baumgart and Daniela Reese at Medac GmbH, Germany for  
1229 providing treosulfan; the Brenden-Colson Center for Pancreatic Care at OHSU  
1230 for providing funding; and Drs. David Jacoby (OHSU) and Vickie Baracos  
1231 (University of Alberta) for their help with editing the manuscript. Bioinformatics  
1232 analytical expertise for this project was supported by partnership between the  
1233 office of the OHSU Senior Vice President for Research, the University Shared  
1234 Resources program, the OCTRI Translational Bioinformatics Program  
1235 (*NIH/NCATS CTSA UL1TR002369*), and the Integrated Genomics Laboratory's

1236 Massively Parallel Sequencing Shared Resources. This work was supported by  
1237 National Institutes of Health grants R01CA184324-01 and R01CA217989-01 to  
1238 D.L. Marks.

1239

1240

#### 1241 **Author Contributions**

1242 K.G. Burfeind, D.L. Marks, and K.A. Michaelis designed the research. K.G.  
1243 Burfeind, M.A. Norgard, X. Zhu, P.R. Levasseur, B. Olson, E.R.S. Torres, and  
1244 E.M. Patel performed the experiments. K.G. Burfeind, S. Jeng, and S.  
1245 McWeeney analyzed the data. K.G. Burfeind wrote the manuscript. All authors  
1246 edited the manuscript. D.L. Marks supervised the study.

1247

1248

1249

1250

1251

1252

1253

1254

1255

1256

1257

1258

1259

1260

1261

1262

1263

1264

1265

1266

1267

1268

1269 **References Cited**

- 1270 Alvarez, J. I., & Teale, J. M. (2006). Breakdown of the blood brain barrier and blood-  
1271 cerebrospinal fluid barrier is associated with differential leukocyte migration  
1272 in distinct compartments of the CNS during the course of murine NCC. *J*  
1273 *Neuroimmunol*, *173*(1-2), 45-55. doi:10.1016/j.jneuroim.2005.11.020
- 1274 Andonegui, G., Zelinski, E. L., Schubert, C. L., Knight, D., Craig, L. A., Winston, B. W., . . .  
1275 Kubes, P. (2018). Targeting inflammatory monocytes in sepsis-associated  
1276 encephalopathy and long-term cognitive impairment. *JCI Insight*, *3*(9).  
1277 doi:10.1172/jci.insight.99364
- 1278 Arima, Y., Ohki, T., Nishikawa, N., Higuchi, K., Ota, M., Tanaka, Y., . . . Murakami, M.  
1279 (2017). Brain micro-inflammation at specific vessels dysregulates organ-  
1280 homeostasis via the activation of a new neural circuit. *eLife*, *6*, e25517.  
1281 doi:10.7554/eLife.25517
- 1282 Atangana, E., Schneider, U. C., Blecharz, K., Magrini, S., Wagner, J., Nieminen-Kelha,  
1283 M., . . . Vajkoczy, P. (2017). Intravascular Inflammation Triggers Intracerebral  
1284 Activated Microglia and Contributes to Secondary Brain Injury After  
1285 Experimental Subarachnoid Hemorrhage (eSAH). *Transl Stroke Res*, *8*(2),  
1286 144-156. doi:10.1007/s12975-016-0485-3
- 1287 Baekelandt, B. M. G., Hjermstad, M. J., Nordby, T., Fagerland, M. W., Kure, E. H.,  
1288 Heiberg, T., . . . Labori, K. J. (2016). Preoperative cognitive function predicts  
1289 survival in patients with resectable pancreatic ductal adenocarcinoma. *HPB :  
1290 the official journal of the International Hepato Pancreato Biliary Association*,  
1291 *18*(3), 247-254. doi:10.1016/j.hpb.2015.09.004
- 1292 Benjamini, Y., & Hochberg, Y. (1995). Controlling the False Discovery Rate: A  
1293 Practical and Powerful Approach to Multiple Testing. *Journal of the Royal  
1294 Statistical Society. Series B (Methodological)*, *57*(1), 289-300.
- 1295 Braun, T. P., Szumowski, M., Levasseur, P. R., Grossberg, A. J., Zhu, X., Agarwal, A., &  
1296 Marks, D. L. (2014). Muscle Atrophy in Response to Cytotoxic Chemotherapy  
1297 Is Dependent on Intact Glucocorticoid Signaling in Skeletal Muscle. *PLoS One*,  
1298 *9*(9), e106489. doi:10.1371/journal.pone.0106489
- 1299 Braun, T. P., Zhu, X., Szumowski, M., Scott, G. D., Grossberg, A. J., Levasseur, P. R., . . .  
1300 Marks, D. L. (2011). Central nervous system inflammation induces muscle  
1301 atrophy via activation of the hypothalamic-pituitary-adrenal axis. *J Exp Med*,  
1302 *208*(12), 2449-2463. doi:10.1084/jem.20111020
- 1303 Burfeind, K. G., Michaelis, K. A., & Marks, D. L. (2016). The central role of  
1304 hypothalamic inflammation in the acute illness response and cachexia. *Semin  
1305 Cell Dev Biol*, *54*, 42-52. doi:10.1016/j.semcdb.2015.10.038
- 1306 Burfeind, K. G., Zhu, X., Levasseur, P. R., Michaelis, K. A., Norgard, M. A., & Marks, D. L.  
1307 (2018). TRIF is a key inflammatory mediator of acute sickness behavior and  
1308 cancer cachexia. *Brain Behav Immun*. doi:10.1016/j.bbi.2018.05.021
- 1309 Campos, C. A., Bowen, A. J., Han, S., Wisse, B. E., Palmiter, R. D., & Schwartz, M. W.  
1310 (2017). Cancer-induced anorexia and malaise are mediated by CGRP neurons  
1311 in the parabrachial nucleus. *Nat Neurosci*, *20*(7), 934-942.  
1312 doi:10.1038/nn.4574
- 1313 Capotondo, A., Milazzo, R., Politi, L. S., Quattrini, A., Palini, A., Plati, T., . . . Biffi, A.  
1314 (2012). Brain conditioning is instrumental for successful microglia

- 1315 reconstitution following hematopoietic stem cell transplantation. *Proceedings*  
1316 *of the National Academy of Sciences*, 109(37), 15018.
- 1317 Cazareth, J., Guyon, A., Heurteaux, C., Chabry, J., & Petit-Paitel, A. (2014). Molecular  
1318 and cellular neuroinflammatory status of mouse brain after systemic  
1319 lipopolysaccharide challenge: importance of CCR2/CCL2 signaling. *J*  
1320 *Neuroinflammation*, 11(1), 132. doi:10.1186/1742-2094-11-132
- 1321 Coffelt, S. B., Wellenstein, M. D., & de Visser, K. E. (2016). Neutrophils in cancer:  
1322 neutral no more. *Nature Reviews Cancer*, 16, 431. doi:10.1038/nrc.2016.52
- 1323 Croft, D., Mundo, A. F., Haw, R., Milacic, M., Weiser, J., Wu, G., . . . D'Eustachio, P.  
1324 (2014). The Reactome pathway knowledgebase. *Nucleic Acids Res*,  
1325 42(Database issue), D472-477. doi:10.1093/nar/gkt1102
- 1326 D'Mello, C., Le, T., & Swain, M. G. (2009). Cerebral microglia recruit monocytes into  
1327 the brain in response to tumor necrosis factoralpha signaling during  
1328 peripheral organ inflammation. *J Neurosci*, 29(7), 2089-2102.  
1329 doi:10.1523/jneurosci.3567-08.2009
- 1330 D'Mello, C., Riazzi, K., Le, T., Stevens, K. M., Wang, A., McKay, D. M., . . . Swain, M. G.  
1331 (2013). P-selectin-mediated monocyte-cerebral endothelium adhesive  
1332 interactions link peripheral organ inflammation to sickness behaviors. *J*  
1333 *Neurosci*, 33(37), 14878-14888. doi:10.1523/jneurosci.1329-13.2013
- 1334 Desnos, C., Schonn, J. S., Huet, S., Tran, V. S., El-Amraoui, A., Raposo, G., . . . Darchen, F.  
1335 (2003). Rab27A and its effector MyRIP link secretory granules to F-actin and  
1336 control their motion towards release sites. *J Cell Biol*, 163(3), 559-570.  
1337 doi:10.1083/jcb.200302157
- 1338 Fabregat, A., Jupe, S., Matthews, L., Sidiropoulos, K., Gillespie, M., Garapati, P., . . .  
1339 D'Eustachio, P. (2018). The Reactome Pathway Knowledgebase. *Nucleic Acids*  
1340 *Res*, 46(D1), D649-d655. doi:10.1093/nar/gkx1132
- 1341 Fearon, K., Strasser, F., Anker, S. D., Bosaeus, I., Bruera, E., Fainsinger, R. L., . . .  
1342 Baracos, V. E. (2011). Definition and classification of cancer cachexia: an  
1343 international consensus. *Lancet Oncol*, 12(5), 489-495. doi:10.1016/S1470-  
1344 2045(10)70218-7
- 1345 Foley, K., Rucki, A. A., Xiao, Q., Zhou, D., Leubner, A., Mo, G., . . . Zheng, L. (2015).  
1346 Semaphorin 3D autocrine signaling mediates the metastatic role of annexin  
1347 A2 in pancreatic cancer. *Sci Signal*, 8(388), ra77.  
1348 doi:10.1126/scisignal.aaa5823
- 1349 Gombart, A. F., Kwok, S. H., Anderson, K. L., Yamaguchi, Y., Torbett, B. E., & Koeffler,  
1350 H. P. (2003). Regulation of neutrophil and eosinophil secondary granule gene  
1351 expression by transcription factors C/EBP epsilon and PU.1. *Blood*, 101(8),  
1352 3265-3273. doi:10.1182/blood-2002-04-1039
- 1353 Grossberg, A. J., Zhu, X., Leininger, G. M., Levasseur, P. R., Braun, T. P., Myers, M. G.,  
1354 Jr., & Marks, D. L. (2011). Inflammation-induced lethargy is mediated by  
1355 suppression of orexin neuron activity. *J Neurosci*, 31(31), 11376-11386.  
1356 doi:10.1523/JNEUROSCI.2311-11.2011
- 1357 He, H., Geng, T., Chen, P., Wang, M., Hu, J., Kang, L., . . . Tang, H. (2016). NK cells  
1358 promote neutrophil recruitment in the brain during sepsis-induced  
1359 neuroinflammation. *Scientific Reports*, 6, 27711. doi:10.1038/srep27711

- 1360 Kerfoot, S. M., D'Mello, C., Nguyen, H., Ajuebor, M. N., Kubes, P., Le, T., & Swain, M. G.  
1361 (2006). TNF-alpha-secreting monocytes are recruited into the brain of  
1362 cholestatic mice. *Hepatology*, 43(1), 154-162. doi:10.1002/hep.21003
- 1363 Laye, S., Gheusi, G., Cremona, S., Combe, C., Kelly, K., Dantzer, R., & Parnet, P. (2000).  
1364 Endogenous brain IL-1 mediates the response to peripheral LPS. *Am J Phys*  
1365 *Reg Integr Comp Physiol*, 279(1), R93-R98.
- 1366 Love, M. I., Huber, W., & Anders, S. (2014). Moderated estimation of fold change and  
1367 dispersion for RNA-seq data with DESeq2. *Genome Biology*, 15(12), 550.  
1368 doi:10.1186/s13059-014-0550-8
- 1369 Maldonado, M., Molfese, D. L., Viswanath, H., Curtis, K., Jones, A., Hayes, T. G., . . .  
1370 Salas, R. (2018). The habenula as a novel link between the homeostatic and  
1371 hedonic pathways in cancer-associated weight loss: a pilot study. *J Cachexia*  
1372 *Sarcopenia Muscle*, 9(3), 497-504. doi:10.1002/jcsm.12286
- 1373 Martin, E., Amar, M., Dalle, C., Youssef, I., Boucher, C., Le Duigou, C., . . . Delarasse, C.  
1374 (2018). New role of P2X7 receptor in an Alzheimer's disease mouse model.  
1375 *Mol Psychiatry*. doi:10.1038/s41380-018-0108-3
- 1376 McGinnis, G. J., Friedman, D., Young, K. H., Torres, E. R. S., Thomas, C. R., Gough, M. J.,  
1377 & Raber, J. (2017). Neuroinflammatory and cognitive consequences of  
1378 combined radiation and immunotherapy in a novel preclinical model.  
1379 *Oncotarget*, 8(6), 9155-9173. doi:10.18632/oncotarget.13551
- 1380 Meyers, C. A. (2000). Neurocognitive dysfunction in cancer patients. *Oncology*  
1381 *(Williston Park)*, 14(1), 75-79; discussion 79, 81-72, 85.
- 1382 Michaelis, K. A., Zhu, X., Burfeind, K. G., Krasnow, S. M., Lévassieur, P. R., Morgan, T. K.,  
1383 & Marks, D. L. (2017). Establishment and characterization of a novel murine  
1384 model of pancreatic cancer cachexia. *J Cachexia Sarcopenia Muscle*, 8(5), 824-  
1385 838. doi:10.1002/jcsm.12225
- 1386 Michot, J. M., Bigenwald, C., Champiat, S., Collins, M., Carbonnel, F., Postel-Vinay, S., . . .  
1387 Lambotte, O. (2016). Immune-related adverse events with immune  
1388 checkpoint blockade: a comprehensive review. *European Journal of Cancer*,  
1389 54, 139-148. doi:<https://doi.org/10.1016/j.ejca.2015.11.016>
- 1390 Miller, A. H., Ancoli-Israel, S., Bower, J. E., Capuron, L., & Irwin, M. R. (2008).  
1391 Neuroendocrine-immune mechanisms of behavioral comorbidities in  
1392 patients with cancer. *J Clin Oncol*, 26(6), 971-982.  
1393 doi:10.1200/JCO.2007.10.7805
- 1394 Mrdjen, D., Pavlovic, A., Hartmann, F. J., Schreiner, B., Utz, S. G., Leung, B. P., . . .  
1395 Becher, B. (2018). High-Dimensional Single-Cell Mapping of Central Nervous  
1396 System Immune Cells Reveals Distinct Myeloid Subsets in Health, Aging, and  
1397 Disease. *Immunity*, 48(2), 380-395.e386. doi:10.1016/j.immuni.2018.01.011
- 1398 Neumann, J., Henneberg, S., von Kenne, S., Nolte, N., Müller, A. J., Schraven, B., . . .  
1399 Riek-Burchardt, M. (2018). Beware the intruder: Real time observation of  
1400 infiltrated neutrophils and neutrophil—Microglia interaction during stroke  
1401 in vivo. *PLoS One*, 13(3), e0193970. doi:10.1371/journal.pone.0193970
- 1402 Neumann, J., Sauerzweig, S., Ronicke, R., Gunzer, F., Dinkel, K., Ullrich, O., . . .  
1403 Reymann, K. G. (2008). Microglia cells protect neurons by direct engulfment  
1404 of invading neutrophil granulocytes: a new mechanism of CNS immune



- 1405 privilege. *J Neurosci*, 28(23), 5965-5975. doi:10.1523/jneurosci.0060-  
1406 08.2008
- 1407 Otxoa-de-Amezaga, A., Miró-Mur, F., Pedragosa, J., Gallizioli, M., Justicia, C., Gaja-  
1408 Capdevila, N., . . . Planas, A. M. (2018). Microglial cell loss after ischemic  
1409 stroke favors brain neutrophil accumulation. *Acta Neuropathologica*.  
1410 doi:10.1007/s00401-018-1954-4
- 1411 Prinz, M., & Priller, J. (2017). The role of peripheral immune cells in the CNS in  
1412 steady state and disease. *Nat Neurosci*, 20(2), 136-144. doi:10.1038/nn.4475
- 1413 Qian, B.-Z., Li, J., Zhang, H., Kitamura, T., Zhang, J., Campion, L. R., . . . Pollard, J. W.  
1414 (2011). CCL2 recruits inflammatory monocytes to facilitate breast-tumour  
1415 metastasis. *Nature*, 475, 222. doi:10.1038/nature10138  
1416 <https://www.nature.com/articles/nature10138-supplementary-information>
- 1417 Roth, T. L., Nayak, D., Atanasijevic, T., Koretsky, A. P., Latour, L. L., & McGavern, D. B.  
1418 (2014). Transcranial amelioration of inflammation and cell death after brain  
1419 injury. *Nature*, 505(7482), 223-228. doi:10.1038/nature12808
- 1420 Ruhnau, J., Schulze, J., Dressel, A., & Vogelgesang, A. (2017). Thrombosis,  
1421 Neuroinflammation, and Poststroke Infection: The Multifaceted Role of  
1422 Neutrophils in Stroke. *Journal of Immunology Research*, 2017, 5140679.  
1423 doi:10.1155/2017/5140679
- 1424 Ruud, J., Wilhelms, D. B., Nilsson, A., Eskilsson, A., Tang, Y.-J., Ströhle, P., . . .  
1425 Blomqvist, A. (2013). Inflammation- and tumor-induced anorexia and weight  
1426 loss require MyD88 in hematopoietic/myeloid cells but not in brain  
1427 endothelial or neural cells. *The FASEB Journal*, 27(5), 1973-1980.  
1428 doi:10.1096/fj.12-225433
- 1429 Schmitt, C., Strazielle, N., & Ghersi-Egea, J. F. (2012). Brain leukocyte infiltration  
1430 initiated by peripheral inflammation or experimental autoimmune  
1431 encephalomyelitis occurs through pathways connected to the CSF-filled  
1432 compartments of the forebrain and midbrain. *J Neuroinflammation*, 9.  
1433 doi:10.1186/1742-2094-9-187
- 1434 Souto, F. O., Alves-Filho, J. C., Freitas, A., Spiller, F., Martins, M. A., Basile-Filho, A., &  
1435 Cunha, F. Q. (2009). CCR2 expression on neutrophils leads to detrimental  
1436 tissue infiltration during sepsis. *Critical Care*, 13(Suppl 3), P9-P9.  
1437 doi:10.1186/cc7811
- 1438 Souto, F. O., Alves-Filho, J. C., Turato, W. M., Auxiliadora-Martins, M., Basile-Filho, A.,  
1439 & Cunha, F. Q. (2011). Essential role of CCR2 in neutrophil tissue infiltration  
1440 and multiple organ dysfunction in sepsis. *Am J Respir Crit Care Med*, 183(2),  
1441 234-242. doi:10.1164/rccm.201003-0416OC
- 1442 Szmydynger-Chodobska, J., Shan, R., Thomasian, N., & Chodobski, A. (2016). The  
1443 Involvement of Pial Microvessels in Leukocyte Invasion after Mild Traumatic  
1444 Brain Injury. *PLoS One*, 11(12), e0167677.  
1445 doi:10.1371/journal.pone.0167677
- 1446 Talbert, E. E., Lewis, H. L., Farren, M. R., Ramsey, M. L., Chakedis, J. M., Rajasekera, P., .  
1447 . . Guttridge, D. C. (2018). Circulating monocyte chemoattractant protein - 1  
1448 (MCP - 1) is associated with cachexia in treatment - naïve pancreatic cancer

- 1449 patients. *Journal of Cachexia, Sarcopenia and Muscle*, 9(2), 358-368.  
1450 doi:10.1002/jcsm.12251
- 1451 Tanaka, Y., Arima, Y., Kamimura, D., & Murakami, M. (2017). The Gateway Reflex, a  
1452 Novel Neuro-Immune Interaction for the Regulation of Regional Vessels.  
1453 *Frontiers in Immunology*, 8, 1321. doi:10.3389/fimmu.2017.01321
- 1454 Young, M. D., Wakefield, M. J., Smyth, G. K., & Oshlack, A. (2010). Gene ontology  
1455 analysis for RNA-seq: accounting for selection bias. *Genome Biology*, 11(2),  
1456 R14. doi:10.1186/gb-2010-11-2-r14
- 1457 Zenaro, E., Pietronigro, E., Bianca, V. D., Piacentino, G., Marongiu, L., Budui, S., . . .  
1458 Constantin, G. (2015). Neutrophils promote Alzheimer's disease-like  
1459 pathology and cognitive decline via LFA-1 integrin. *Nat Med*, 21(8), 880-886.  
1460 doi:10.1038/nm.3913  
1461 <http://www.nature.com/nm/journal/v21/n8/abs/nm.3913.html> - supplementary-  
1462 [information](#)  
1463
